# Supplementary material for: Publication trends in newspapers and scientific journals for SSRIs and suicidality: a systematic longitudinal study
Source: PubMed Central journal article supplement — BMJ Open. 2011 Dec 6;1(2):e000290. doi: 10.1136/bmjopen-2011-000290 (PMC3236820; doi:10.1136/bmjopen-2011-000290), 2011-12-06
Supplement: bmjopen-2011-000290-s2.pdf [file bmjopen-2011-000290-s2.pdf]

**Please note:** BMJ Group requires compliance to the following reporting guidelines, please upload your completed check-list with your submission and label it " Research checklist":

**Guidance and forms are available [here](#)**

- CONSORT statement - *Required for all randomised controlled trials*
- PRISMA statement - *Required for all systematic reviews*
- EVEREST statement - *Required for all economic evaluations*
- STARD statement - *Required for all diagnostic research papers*
- STROBE statement - *Required for all observational studies*
- MOOSE statement - *Required for all meta-analyses of observational studies*
