# Supplementary material for: Publication trends in newspapers and scientific journals for SSRIs and suicidality: a systematic longitudinal study
Source: PubMed Central journal article supplement — BMJ Open. 2011 Dec 6;1(2):e000290. doi: 10.1136/bmjopen-2011-000290 (PMC3236820; doi:10.1136/bmjopen-2011-000290), 2011-12-06
Supplement: bmjopen-2011-000290.draft_revisions.pdf [file bmjopen-2011-000290.draft_revisions.pdf]

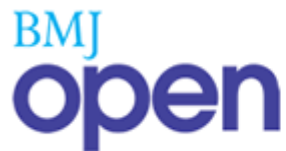

**Publication trends in newspapers and scientific journals for  
SSRIs and suicidality: a systematic longitudinal study**

|                                 |                                                                                                                                                                                                                                                                                                                                                                                                                                                                                                                                                                                                                                                                     |
|---------------------------------|---------------------------------------------------------------------------------------------------------------------------------------------------------------------------------------------------------------------------------------------------------------------------------------------------------------------------------------------------------------------------------------------------------------------------------------------------------------------------------------------------------------------------------------------------------------------------------------------------------------------------------------------------------------------|
| Journal:                        | <i>BMJ Open</i>                                                                                                                                                                                                                                                                                                                                                                                                                                                                                                                                                                                                                                                     |
| Manuscript ID:                  | bmjopen-2011-000290                                                                                                                                                                                                                                                                                                                                                                                                                                                                                                                                                                                                                                                 |
| Article Type:                   | Research                                                                                                                                                                                                                                                                                                                                                                                                                                                                                                                                                                                                                                                            |
| Date Submitted by the Author:   | 05-Aug-2011                                                                                                                                                                                                                                                                                                                                                                                                                                                                                                                                                                                                                                                         |
| Complete List of Authors:       | Hernandez, Francisco; Utrecht University, Pharmacoepidemiology & Clinical Pharmacology<br>Mantel-Teeuwisse, Aukje; Utrecht University, Pharmacoepidemiology & Clinical Pharmacology<br>van Thiel, Ghislaine; University Medical Centre Utrecht, Julius Centre for Health Sciences and Primary Care<br>Belitser, Svetlana; Utrecht University, Pharmacoepidemiology & Clinical Pharmacology<br>Raaijmakers, Jan; Utrecht University, Pharmacoepidemiology & Clinical Pharmacology; GlaxoSmithKline, External Scientific Collaborations Europe<br>Pieters, Toine; Utrecht University, Pharmacoepidemiology & Clinical Pharmacology; VU Medical Centre Amsterdam, EMGO |
| <b>Primary Subject Heading</b>: | Health service research                                                                                                                                                                                                                                                                                                                                                                                                                                                                                                                                                                                                                                             |
| Keywords:                       | newspapers, SSRIs, suicidality, scientific literature, dissemination, coverage                                                                                                                                                                                                                                                                                                                                                                                                                                                                                                                                                                                      |
|                                 |                                                                                                                                                                                                                                                                                                                                                                                                                                                                                                                                                                                                                                                                     |

SCHOLARONE™  
Manuscripts

1  
2  
3  
4  
5  
6  
7  
8  
9  
10  
11  
12  
13  
14  
15  
16  
17  
18  
19  
20  
21  
22  
23  
24  
25  
26  
27  
28  
29  
30  
31  
32  
33  
34  
35  
36  
37  
38  
39  
40  
41  
42  
43  
44  
45  
46  
47  
48  
49  
50  
51  
52  
53  
54  
55  
56  
57  
58  
59  
60

**Publication trends in newspapers and scientific journals for SSRIs and suicidality: a systematic longitudinal study**

**J.F. Hernandez<sup>1</sup>, A.K. Mantel-Teeuwisse<sup>1</sup>, G.J.M.W. van Thiel<sup>2</sup>, S.V. Belitser<sup>1</sup>, J.A.M. Raaijmakers<sup>1,4</sup>, T. Pieters<sup>1,3</sup>**

*<sup>1</sup>Department of Pharmacoepidemiology & Clinical Pharmacology, Utrecht Institute for Pharmaceutical Sciences (UIPS), Utrecht University, David de Wied building, Universiteitsweg 99, 3584 CG Utrecht, P.O. Box 80082, Utrecht, the Netherlands*

*<sup>2</sup>Julius Centre for Health Sciences and Primary Care, University Medical Centre Utrecht, Universiteitsweg 100, 3584 CG Utrecht, P.O. Box 85500, 3508 GA Utrecht, The Netherlands*

*<sup>3</sup>EMGO, VU Medical Centre, Amsterdam, Van der Boechorststraat 7, 1081 BT Amsterdam, The Netherlands*

*<sup>4</sup>GlaxoSmithKline, External Scientific Collaborations Europe, Huis ter Heideweg 62, 3705 LZ Zeist, P.O. Box 780, 3700 AT Zeist, Zeist, the Netherlands*

Correspondence to: Prof. Dr. Toine Pieters

Utrecht Institute for Pharmaceutical Sciences (UIPS), Division of Pharmacoepidemiology & Clinical Pharmacology; P.O. Box 80 082, 3584 CG Utrecht, the Netherlands. Tel.: +31 30 253 7324; fax: +31 30 253 9166. E-mail address: [t.pieters@uu.nl](mailto:t.pieters@uu.nl)

Keywords: newspapers, SSRIs, suicidality, scientific literature, dissemination, coverage.

Short title: Publication trends in newspapers and scientific journals for SSRIs & suicidality.

1  
2  
3 Word count (excluding title page, abstract, references, figures and tables): 2758  
4  
5 words.  
6  
7  
8  
9

10  
11 “The Corresponding Author has the right to grant on behalf of all authors and  
12 does grant on behalf of all authors, a worldwide licence to the Publishers and its  
13 licensees in perpetuity, in all forms, formats and media (whether known now or  
14 created in the future), to i) publish, reproduce, distribute, display and store the  
15 Contribution, ii) translate the Contribution into other languages, create  
16 adaptations, reprints, include within collections and create summaries, extracts  
17 and/or, abstracts of the Contribution, iii) create any other derivative work(s)  
18 based on the Contribution, iv) to exploit all subsidiary rights in the Contribution,  
19 v) the inclusion of electronic links from the Contribution to third party material  
20 where-ever it may be located; and, vi) licence any third party to do any or all of  
21 the above.”  
22  
23  
24  
25  
26  
27  
28  
29  
30  
31  
32  
33  
34  
35  
36  
37  
38  
39  
40  
41  
42  
43  
44  
45  
46  
47  
48  
49  
50  
51  
52  
53  
54  
55  
56  
57  
58  
59  
60

## Abstract

**Background:** In the period 2003–2008, the regulatory authorities issued several warnings restricting the use of SSRIs in paediatrics, in reaction to safety concerns regarding the risk of suicidality. In this study, the SSRIs and suicidality controversy served as a template to analyse the long-term dissemination dynamics of the benefit/risk profile of medications.

**Methods:** A systematic review of scientific articles (Embase), and NL and UK newspapers (LexisNexis) was performed between 2000–2010. Categorization was done by 'effect' (related treatment effect), 'type of article' and 'age group'. The articles' positive-to-negative effect ratio was determined. Differences in distribution of 'effect' categories were analysed across sources, 'type of article', and 'age group' using the Mann-Whitney (2 sub-groups) or Kruskal-Wallis test (3 or more).

**Findings:** In total, 1141 articles were categorized: 352 scientific, 224 Dutch, and 565 British newspaper articles. Scientific articles were predominantly on research and were positive, whereas newspaper articles were negative (ratios=3.50–scientific, 0.69–NL and 0.94–UK;  $P<0.001$ ). Articles on paediatrics were less positive in scientific journals and more negative in newspapers (ratios=2.29–scientific, 0.26–NL, and 0.20–UK;  $P<0.001$ ), while articles on adults were positive overall (ratios=10.0–scientific, 1.06–NL, and 1.70–UK;  $P<0.001$ ). In addition, negative-effect reporting trends were exacerbated following regulatory warnings and were generally opinion articles, both in scientific journals and newspapers (2003/4 and after 2007).

1  
2  
3 **Interpretation:** 'Good' news in scientific journals is determined by a positive  
4 bias in research reporting, however, based on clinical studies outcomes, whereas  
5 'bad' news is related to opinion. Scientific journals and newspapers coincided in  
6 the nature and timing of opinion articles. The increase of negative-effect articles  
7 in scientific journals and newspapers following regulatory warnings indicates  
8 that the public has been informed in a timely fashion.  
9  
10  
11  
12  
13  
14  
15  
16  
17  
18  
19

## 20 **Article Summary**

### 21 Article Focus:

- 22 • Coverage of health related issues exemplify the relevance of scientific  
23 journals evidence through news media to inform the public, yet information  
24 might be distorted or confusing in some cases.
- 25 • The coverage of drug safety controversies in newspapers vis-à-vis scientific  
26 journals has not been thoroughly studied.

### 27 Key Messages:

- 28 • A positive publication bias was confirmed in scientific journals, however,  
29 based on clinical studies outcomes, whereas 'bad' news in scientific journals  
30 and newspapers was related to opinion, not evidence.
- 31 • This 'bad' news trend was connected to the regulatory warnings, meaning  
32 that the public was informed on time about the SSRIs and suicidality  
33 controversy, although the information that reached the public was not  
34 uniform.
- 35 • An open dialogue between stakeholders will improve communication to the  
36 public and will educate them about the benefits and risks of medicines,  
37 especially during a drug safety controversy.

1  
2  
3 Strengths and Limitations:  
4

5  
6 • The study provides for the first time a head-to-head comparison of the  
7  
8 process of the dissemination of knowledge and the interaction between  
9  
10 scientific journals and newspapers during a drug safety controversy.

11  
12  
13 • Our study covers 11% of the total population per country (NL and UK)  
14  
15 based on circulation figures.  
16

17  
18 

---

  
19 • Extraction of the articles was performed based on keywords, which might  
20  
21 result in that some relevant articles have been omitted.  
22

23  
24  
25  
26  
27  
28  
29  
30  
31  
32  
33  
34  
35  
36  
37  
38  
39  
40  
41  
42  
43  
44  
45  
46  
47  
48  
49  
50  
51  
52  
53  
54  
55  
56  
57  
58  
59  
60

For peer review only

## Introduction

The news media are an important source of information about therapeutic drugs and health.[1] Coverage varies from communicating the benefits and risks of medications, to drug regulation and litigation, among others.[2,3] Scientific journals are a significant source of information for journalists writing about medicine.[4] However, this does not necessarily mean that 'good' or 'bad' news about medicines in the news media is determined by the scientific literature.[4,5] The 'good' news and 'bad' news in both news media and scientific and medical journals may be in agreement, but may also differ dramatically depending on the situation.[6,7]

Health care providers and consumers alike seek medical information from the news media and act on it accordingly, changing their perceptions and behaviour.[8,9] Coverage of medical news exemplifies how information from the news media and scientific journals can have a significant impact, yet be confusing.[7,10,11] Most newspapers' coverage studies of the benefits and risks of medications, although valuable, are short-term and lack a comparative perspective among countries.[2,8,12] Given the media's impact on public perceptions, which in turn might affect public trust in drug governance, health care providers, consumers and regulators should have a better understanding of the distinct process of knowledge dissemination by scientific journals compared to newspapers. The dissemination dynamics of 'bad' and 'good' news might differ when taking into account long-term reporting trends using a comparative perspective and during a drug safety controversy. In this study, the SSRIs and suicidality controversy (see box) serves as an example to study the long-term dissemination dynamics of the benefits and risks of medications. Hence, the

1  
2  
3 characteristics and dynamics of coverage on SSRIs and suicidality by scientific  
4 and medical journals and newspapers in NL and in UK were assessed from 2000  
5  
6  
7  
8 to 2010.

#### 10 **The SSRIs and suicidality controversy**

12  
13 In the period 2003–2008, regulatory authorities (FDA, MHRA and EMA, among  
14 others) issued several warnings restricting the use of SSRIs in paediatrics, in  
15 reaction to safety concerns regarding suicidal ideation.[13–15] While some  
16 scientists adulated the warnings, others expressed their concerns about the  
17 implied consequences.[16,17] The safety issue arose following GlaxoSmithKline’s  
18 (GSK) request for a 6-month market exclusivity extension with the FDA for the  
19 use of paroxetine (a SSRI) to treat paediatric depression in response to the Food  
20 and Drug Administration Modernization Act (FDAMA). Consequently, GSK  
21 submitted the results from unpublished paediatric clinical data to the FDA.  
22  
23 Meanwhile, the BBC aired a documentary entitled ‘The secrets of Seroxat’ on  
24 October 13 2002 in which it was alleged that internal documents of GSK showed  
25 that the dissemination of trial data on paroxetine in childhood depression was  
26 spun ‘to minimize any negative commercial impact’.[18] GSK was accused of  
27 underplaying the association between SSRIs and suicidality. The ensuing  
28 worldwide media exposure played a role in driving the SSRI suicide controversy.  
29  
30 In the process, confidence in the pharmaceutical industry and regulatory  
31 authorities decreased significantly.[19] To date, the controversy remains  
32 unsettled, albeit evidence also suggests that SSRIs are useful first-line  
33 treatments for depression and most anxiety disorders but exhaustive monitoring  
34 is recommended during the initiating phase.[20]



## Methods

### Time frame

Content analysis was performed on articles published in the period January 2000 to December 2009, including the period in which the regulatory warnings were repeatedly enforced, i.e., 2003/4 and 2007.

### Data sources

Scientific articles were extracted from Embase (compilation of Medline and 2000 extra journals not covered by Medline) using two sets of keywords, i.e., first: 'serotonin uptake inhibitor' NOT 'serotonin noradrenalin reuptake inhibitor' AND 'suicidal behavior' or 'automutilation' or 'aggression' AND 'depression'; and second: 'serotonin uptake inhibitor' NOT 'serotonin noradrenalin reuptake inhibitor' AND 'suicide'. The search was limited to 'humans', and 'Dutch' and 'English' language.

Newspapers articles were extracted using the LexisNexis database from a selection of high-circulation newspapers in NL (n=six) and in UK (n=four). The newspapers analysed were: *De Telegraaf*, *Algemeen Dagblad*, *De Volkskrant*, *NRC Handelsblad*, *Trouw* and *Het Parool* for NL; and *The Sun*, *Daily Mail*, *The Daily Telegraph* and *The Times* for UK. The newspapers' circulation figures (per country) covered 11% of each total resident population.[21,22] Search queries were performed in the language of the papers (Dutch and English). Dutch articles were retrieved using the terms 'antidepressiv!' or 'anti-depressiv!' or 'SSRI!' or 'serotonine!' AND 'zelfmoord!' or 'aggressi!' or 'geweld!' or 'kwaad!' or 'suicid!' AND 'depressi!'. British articles were extracted using the terms 'antidepress!' or

1  
2  
3 'anti-depress!' or 'SSRI!' or 'serotonin!' AND 'suicid!' or 'aggressi!' or 'violen!' or  
4  
5  
6 'harm!' AND 'depressi!'.  
7

### 8 9 **Data classification**

10  
11 All articles addressing SSRIs, depression, suicidal thoughts, or suicide as the  
12  
13 main topic were eligible for analysis. If that was not the case, such an article was  
14  
15 categorized as 'out of context', e.g., articles reporting the use of SSRIs to treat  
16  
17 premature ejaculation or neuralgia. All scientific and newspaper articles were  
18  
19 analysed on the content of full-text, except for scientific articles where the  
20  
21 abstract information was regarded as sufficient for categorization. The 'effect',  
22  
23 'type of article', and 'age group' categories were independently determined for  
24  
25 these articles by two researchers.  
26  
27  
28  
29

30  
31 The 'effect' category was divided into positive, neutral, and negative. Articles  
32  
33 reporting on positive therapeutic outcomes with no confirmation of causality  
34  
35 between SSRIs and suicidal behaviour were classified as positive. Consequently,  
36  
37 articles reporting on the association between SSRI use and suicidality, with little  
38  
39 or no mention of positive therapeutic outcomes, were classified as negative.  
40  
41 Articles with a balanced message (positive and negative effects) were classified  
42  
43 as neutral. The 'type of article' category was defined within scientific journals as:  
44  
45 case study (patient report), research (study results, such as RCTs, meta-  
46  
47 analyses, observational studies, etc.), opinion (letters, commentaries, replies,  
48  
49 etc.), and policy (regulatory-related, etc.). The definition of 'type of article' in  
50  
51 newspapers was based on the nature of the news: interview, opinion (author's  
52  
53 perspective), news report (informative news or general journalism), science  
54  
55 journalism (scientific information or reports), and policy (reimbursement,  
56  
57  
58  
59  
60

1  
2  
3 change of indication, etc.). Finally, the 'age group' category considered adults  
4 (above 18 years old), paediatric (18 years old or younger), both (adult and  
5  
6  
7  
8  
9 paediatric) or unspecified.

10  
11 Scoring discrepancies between the two researchers occurred in approximately  
12  
13 5% of all articles. In a case of discrepancy, the categorization of the article in  
14  
15  
16  
17 question was settled by consensus.

### 18 19 **Data analysis**

20  
21 The positive-to-negative ratio of the 'effect' category was calculated (per source,  
22  
23  
24  
25  
26  
27  
28  
29  
30  
31  
32  
33  
34  
35  
36  
37  
38  
39  
40  
41  
42  
43  
44  
45  
46  
47  
48  
49  
50  
51  
52  
53  
54  
55  
56  
57  
58  
59  
60  
The positive-to-negative ratio of the 'effect' category was calculated (per source, 'type of article', and 'age group' categories). For the statistical analyses, the total count of articles per category was used. Differences in distribution of the 'effect' categories (positive, neutral and negative) were analysed across the sources (Embase, Dutch and/or UK newspaper articles); 'type of article', and 'age group' were analysed using the Mann-Whitney (2 sub-groups) or Kruskal-Wallis test (3 or more). Statistical significance was defined as  $P < 0.05$ . Statistical analyses were performed using SPSS software (release 18.0.3).

To assess the publication dynamics, the number of articles (in scientific journals and/or in newspapers) was plotted per year (2000-2010), and per category ('effect', 'type of article', or 'age group').

### 50 51 52 53 54 55 56 57 58 59 60 **Results**

A total of 1736 articles were retrieved based on the predefined key word sets. Of these, 1141 articles were fully categorized: 352 scientific, 224 Dutch newspaper articles and 565 British newspaper articles (Figure 1). The characteristics of the articles are listed in Table 1.

### Publication patterns of the 'effect' category

Of all 1141 articles (scientific and newspapers), the positive-effect category (39%) was significantly larger than the negative-effect (31%) or the neutral-effect categories (30%;  $P < 0.001$ ). The differentiation of the 'effect' category by source showed that scientific journals were predominantly positive (ratio=3.5), whereas Dutch and British newspapers coverage of 'effect' was mainly negative (ratios=0.69–NL and 0.94–UK, Table 1). Statistically significant differences were observed in 'effect' classification for scientific journals and newspapers (both  $P < 0.001$ ), but not between NL and UK dailies ( $P = 0.116$ , Table 2).

Although the overall coverage of 'effect' was generally positive in scientific journals, temporal changes were observed in the positive-to-negative 'effect' ratio per year, indicating a less positive-effect trend during 2003/4 and after 2007. Newspaper reporting revealed a similar trend as scientific journals. However, the positive-to-negative 'effect' ratio per year in newspapers shifted to the negative side from 2003 to 2005 and after 2007 (Figure 2B). This specific increase in negative-effect articles in newspapers was characterized by repetitive reports about lawsuits (e.g., lawyers' unsubstantiated claims of a causal association between murder and suicide attempts and the use of SSRIs), whistle-blowers or other media interventions, which fuelled the discussion.

### Publication patterns of the 'type of article' category

Scientific journals published generally research articles (60%), carrying a positive-effect message (ratio=8.5, Table 2). To a lesser extent, scientific journals published opinion articles (34%), which conveyed an overall positive-effect message (ratio=1.2, Table 2). However, scientific opinion articles displayed

1  
2  
3 major temporal changes in the positive-to-negative 'effect' ratio following  
4 regulatory warnings, showing more negative-effect articles. The nature of these  
5 articles was primarily criticism of methodological issues or the author's  
6 perspective on SSRIs. Differences of 'effect' distributions related to 'types of  
7 article' were statistically significant ( $P < 0.001$ , Table 2).

8  
9  
10  
11  
12  
13  
14  
15  
16  
17  
18  
19  
20  
21  
22  
23  
24  
25  
26  
27  
28  
29  
30  
31  
32  
33  
34  
35  
36  
37  
38  
39  
40  
41  
42  
43  
44  
45  
46  
47  
48  
49  
50  
51  
52  
53  
54  
55  
56  
57  
58  
59  
60  
Newspapers published mainly news report articles (50.5%) and carried an overall negative-effect message (ratio=0.5, Table 2). A similar negative-effect trend was measured in scientific journalism articles (ratio=0.7). Newspaper opinion articles also portrayed an overall positive-effect message (ratio=2.1), as observed for opinion articles in scientific journals (ratio=1.2, Table 2). Major temporal changes in the positive-to-negative 'effect' ratio of newspaper articles were visible in the period of regulatory warnings (2002-2005 and 2007-2008, Figure 2B). Differences between 'effect' distributions related to 'types of article' were statistically significant in the accumulated newspaper articles group, UK newspaper articles ( $P < 0.001$ ), and in NL newspaper articles ( $P = 0.011$ ).

#### **Publication patterns of the 'age group' category**

Scientific journals reported more frequently on paediatrics (31%) than on adults (25%;  $P < 0.001$ ). Articles on adults were notably more positive concerning 'effect' compared to paediatric articles (ratio=10 and 2.3, Table 2).

Newspapers paid more attention to adults (56%) than paediatrics (15%, Table 1). Reporting trend for articles on adults was primarily positive about 'effect', whereas those on paediatrics were mainly negative (ratio=1.5 and 0.2). Significant differences were found between 'effect' distributions in newspapers

1  
2  
3 related to 'age group' ( $P < 0.001$ ). Reporting patterns between NL and UK dailies  
4  
5 were comparable in all three categories ( $P = 0.116$ , Table 2).  
6  
7

8 Articles on paediatrics in scientific journals and in newspapers displayed similar  
9  
10 publication dynamics, i.e., a significant peak in 2004, following the warnings. The  
11  
12 publication dynamics of articles on adults in scientific journals and newspapers  
13  
14 also showed a similar pattern. Thereafter, newspaper articles on adults  
15  
16 continued to increase until 2010, while their scientific counterparts remained  
17  
18 more or less stable (Figure 3).  
19  
20  
21  
22  
23  
24

## 25 Discussion

26  
27  
28 This study assessed the characteristics and dynamics of SSRIs and suicidality  
29  
30 coverage by scientific and medical journals in general, and newspapers in NL and  
31  
32 UK from 2000 to 2010. Scientific journals published predominantly research  
33  
34 articles about positive therapeutic outcomes with little mention of causality  
35  
36 between SSRIs and suicidality, particularly in adults. Despite different ethnic  
37  
38 backgrounds (e.g., tabloid culture in UK, among others) and language, newspaper  
39  
40 reporting trends in NL and UK were comparable; and were overall negative  
41  
42 regarding the therapeutic effect of SSRIs in paediatrics, while positive-effect  
43  
44 reporting prevailed for adults.  
45  
46  
47  
48  
49

50 The present study has several limitations. It covered 11% of the total population  
51  
52 per country based on newspaper circulation figures. Nevertheless, the sample  
53  
54 size might be representative ( $n = 789$  newspaper articles) since we aimed to  
55  
56 understand the type and quantity of information the public receives. Although  
57  
58 reporting trends between countries were comparable, these results must be  
59  
60 extrapolated carefully to other countries. Notwithstanding several keyword sets

1  
2  
3 were used to extract the articles, some relevant articles might have been omitted.  
4  
5 Our sample is, however, random and therefore provides a representative  
6  
7 overview of what has been published on SSRIs and suicidality. Other news media  
8  
9 channels (television, radio, magazines, or the Internet) were not explored. It  
10  
11 would be interesting to analyse the dynamics of knowledge dissemination by  
12  
13 other channels during a drug safety event. However, the systematic analysis of  
14  
15 Internet data remains methodologically complicated since web sites, blogs,  
16  
17 forums, etc, come and go easily, and yet is a massive source of (mis-  
18  
19 information.  
20  
21  
22  
23  
24

25 The finding that scientific and medical journals reported mainly positive  
26  
27 therapeutic outcomes regarding SSRIs might be the influence of a publication  
28  
29 bias in research articles, based on clinical study outcomes. Our results are  
30  
31 consistent with previous work, which demonstrated that antidepressant trials  
32  
33 with a positive outcome were published more often than those with negative  
34  
35 outcomes.[23] However, we differentiated that the positive-effect reporting  
36  
37 trend still dominated after the regulatory warnings. Studies questioning these  
38  
39 warnings, and the possible disservice they did to public health (e.g., the possible  
40  
41 inverse association between SSRIs prescriptions and suicidality, or the decline in  
42  
43 treatment of depression in paediatrics) contributed to this post-warning  
44  
45 positive-effect trend.[16,17] On the other hand, the newspaper dissemination of  
46  
47 scientific-based evidence to the public revealed inconsistencies. For instance,  
48  
49 science journalism articles (newspapers) that presented an overall negative-  
50  
51 effect regarding SSRIs (ratio=0.7), could not be related to the overall positive-  
52  
53 effect reporting trend found in scientific and medical journals. These findings  
54  
55 indicate that either newspaper journalists may selectively report scientific  
56  
57  
58  
59  
60

1  
2  
3 outcomes to the public, as also stated in the CHMP assessment report on  
4 antidepressants,[24] or that controversial, and sometimes misleading, topics  
5  
6 might be selected to increase readership.[4,10,25,26] Such practices might  
7  
8 generate confusion, since the translation of evidence-based medicine to the  
9  
10 public is not uniform.[2,12,27] However, scientific and medical journals might  
11  
12 also do disfavour to the scientific community by favouring positive outcome  
13  
14 studies, thus limiting the journalists' sources of accurate and critic information  
15  
16 to communicate to the public new scientific and medical evidence.  
17  
18  
19  
20  
21

22 Alterations in publication trends of scientific and medical journals and  
23  
24 newspapers could be the direct result of the controversy. The uncertainties  
25  
26 regarding the SSRIs' benefit/risk balance, primarily in paediatrics, have led to  
27  
28 the restriction of almost all SSRIs under 18 year olds in 2003 and further  
29  
30 restrictions for young adults (18 to 24 years old) in 2007.[13–15,28] In the same  
31  
32 periods, our data revealed shifts towards negative-effect reporting trends in  
33  
34 scientific and newspaper articles on paediatrics and opinion articles. A causal  
35  
36 association between this sudden publication growth and the regulatory  
37  
38 warnings was not assessed. However, the timing between the warnings and the  
39  
40 observed increase in articles might substantiate the possible influence of  
41  
42 warnings on media publication trends. Moreover, this increment in the number  
43  
44 of articles might also indicate that newspapers informed the public about this  
45  
46 particular drug safety event in a timely fashion. Burns et al. underlined the  
47  
48 public's right to be informed about medical news within a suitable time  
49  
50 frame.[29] However, their study only focused on two high-ranked scientific  
51  
52 journals, whereas we did not discriminate among scientific journals. A balance  
53  
54 between timely coverage and high-quality information is fundamental when  
55  
56  
57  
58  
59  
60



1  
2  
3 reporting on drug safety controversies. Ideally, this balance should be the result  
4  
5 of open dialogue between healthcare practitioners, academia, governmental  
6  
7 agencies, the pharmaceutical industry, journalists and the lay public. Eventually,  
8  
9 the public ought to and will be properly educated about the benefits and the  
10  
11 risks of medicines by doing so.[30] And, more importantly, public trust will be  
12  
13 maintained during unsettling periods.  
14  
15  
16

17  
18 The implications of the SSRIs and suicidality debate for mentally ill patients must  
19  
20 be more adequately addressed. It has been demonstrated that news media  
21  
22 reports (on suicide, or related to suicide) have an influence on suicidal  
23  
24 behaviour, and on drug usage.[31,32] Further research in this regard might  
25  
26 determine the long-term extent to which scientific journals and newspapers  
27  
28 influenced this group of patients by investigating the long-term prescribing  
29  
30 behaviour of SSRIs.  
31  
32  
33  
34  
35  
36

## 37 **Conclusion**

38  
39  
40 Publication trends in scientific journals and newspapers, during a drug safety  
41  
42 controversy, appear to be more affected by regulatory actions, opinion or  
43  
44 lawsuits, than by a straightforward translation of evidence-based medicine. The  
45  
46 apparent positive publication bias, based on clinical study outcomes, does not  
47  
48 seem to prevent the dissemination of 'bad' news about medications. Agreements  
49  
50 in the nature of opinion reports were found in scientific journals and in NL and  
51  
52 UK dailies. The occurrence of 'good' or 'bad' news in scientific journals and  
53  
54 newspapers was found to be dependent on the news category or type of article.  
55  
56  
57  
58 The increase in the number of articles in scientific journals and in newspapers  
59  
60 during regulatory warnings might indicate that prompt news dissemination

1  
2  
3 through these channels has helped to inform the public about this drug safety  
4  
5 controversy in a timely fashion. It also shows that a proactive and transparent  
6  
7 risk communication strategy of regulatory offices and the pharmaceutical  
8  
9 industry might pay off in the long run for reporting on the benefits and risks of  
10  
11 medications.  
12  
13  
14

#### 15 WHAT IS ALREADY KNOWN ON THE SUBJECT

- 16 • Coverage of health related issues exemplify the relevance of scientific  
17  
18 journals evidence through news media to inform the public, yet  
19  
20 information might be distorted or confusing in some cases.  
21  
22
- 23 • The coverage of drug safety controversies in newspapers vis-à-vis  
24  
25 scientific journals has not been thoroughly studied.  
26  
27  
28  
29

#### 30 WHAT THIS STUDY ADDS

- 31 • A positive publication bias was confirmed in scientific journals, however,  
32  
33 based on clinical studies outcomes, whereas 'bad' news in scientific  
34  
35 journals and newspapers was related to opinion, not evidence.  
36  
37
- 38 • This 'bad' news trend was connected to the regulatory warnings, meaning  
39  
40 that the public was informed on time about the SSRIs and suicidality  
41  
42 controversy, although the information that reached the public was not  
43  
44 uniform.  
45  
46
- 47 • An open dialogue between stakeholders will improve communication to  
48  
49 the public and will educate them about the benefits and risks of  
50  
51 medicines, especially during a drug safety controversy.  
52  
53  
54  
55  
56  
57  
58  
59  
60

**Table 1.** Characteristics of the 1141 articles in NL & UK newspapers and in scientific journals (2000–2009)

| Characteristics            | Scientific Journals<br>(n=352) | NL newspapers<br>(n=224) | UK newspapers<br>(n=565) |
|----------------------------|--------------------------------|--------------------------|--------------------------|
| <b>Effect*</b>             |                                |                          |                          |
| Positive                   | 191 (54)                       | 65 (29)                  | 192 (34)                 |
| Neutral                    | 106 (30)                       | 66 (29)                  | 169 (30)                 |
| Negative                   | 55 (16)                        | 93 (42)                  | 204 (36)                 |
| Positive to negative ratio | 3.5                            | 0.69                     | 0.94                     |
| <b>Type of article</b>     |                                |                          |                          |
| Case study                 | 13 (4)                         | N/A                      | N/A                      |
| Research                   | 210 (60)                       | N/A                      | N/A                      |
| Opinion                    | 121 (34)                       | 25 (11)                  | 107 (19)                 |
| Policy                     | 8 (2)                          | 11 (5)                   | 10 (2)                   |
| Interview                  | N/A                            | 38 (17)                  | 77 (14)                  |
| News report                | N/A                            | 110 (49)                 | 291 (52)                 |
| Science journalism         | N/A                            | 40 (18)                  | 80 (14)                  |
| <b>Age group</b>           |                                |                          |                          |
| Adults                     | 89 (25)                        | 128 (57)                 | 313 (55)                 |
| Paediatric                 | 108 (31)                       | 30 (13)                  | 92 (16)                  |
| Both                       | 80 (23)                        | 32 (14)                  | 66 (12)                  |
| Unspecified                | 75 (21)                        | 34 (15)                  | 94 (17)                  |

1  
2  
3 \*Statistically significant differences in effect classification were observed  
4  
5  
6 between scientific journals and newspapers ( $P < 0.001$ ), but not between NL and  
7  
8 UK dailies ( $P = 0.116$ ). N/A=not applicable.  
9  
10  
11  
12  
13  
14  
15  
16  
17  
18  
19  
20  
21  
22  
23  
24  
25  
26  
27  
28  
29  
30  
31  
32  
33  
34  
35  
36  
37  
38  
39  
40  
41  
42  
43  
44  
45  
46  
47  
48  
49  
50  
51  
52  
53  
54  
55  
56  
57  
58  
59  
60

For peer review only

**Table 2.** Allocation of effect categories related to types of article and age groups, and differentiated by source (NL & UK newspaper articles combined)

| Categories                    |                       | Positive | Neutral | Negative | Positive to<br>negative<br>ratio | p-<br>value |
|-------------------------------|-----------------------|----------|---------|----------|----------------------------------|-------------|
| NL newspapers                 |                       | 65       | 66      | 93       | 0.69                             | 0.116       |
| UK newspapers                 |                       | 192      | 169     | 204      | 0.94                             |             |
| Scientific journals           |                       | 191      | 106     | 55       | 3.50                             | <0.001      |
| NL & UK Newspapers<br>(mixed) |                       | 257      | 235     | 297      | 0.86                             |             |
| Type of article               |                       |          |         |          |                                  |             |
|                               | Case study            | 4        | 4       | 5        | 0.80                             | <0.001      |
| Scientific                    | Research              | 144      | 49      | 17       | 8.47                             |             |
| journals                      | Opinion               | 39       | 49      | 33       | 1.18                             |             |
|                               | Policy                | 3        | 5       | 0        | 3.00                             |             |
|                               | Interview             | 69       | 30      | 16       | 4.31                             | <0.001      |
|                               | News report           | 88       | 125     | 188      | 0.47                             |             |
| Newspapers*                   | Science<br>journalism | 38       | 30      | 52       | 0.73                             |             |
|                               | Opinion               | 60       | 43      | 29       | 2.07                             |             |
|                               | Policy                | 2        | 7       | 12       | 0.17                             |             |
| Age group                     |                       |          |         |          |                                  |             |
| Scientific                    | Adults                | 70       | 12      | 7        | 10.0                             | <0.001      |

|    |            |             |     |     |     |        |
|----|------------|-------------|-----|-----|-----|--------|
| 1  |            |             |     |     |     |        |
| 2  |            |             |     |     |     |        |
| 3  | journals   | Paediatric  | 48  | 39  | 21  | 2.29   |
| 4  |            |             |     |     |     |        |
| 5  |            | Both        | 33  | 29  | 18  | 1.83   |
| 6  |            |             |     |     |     |        |
| 7  |            | Unspecified | 40  | 26  | 9   | 4.44   |
| 8  |            |             |     |     |     |        |
| 9  |            |             |     |     |     |        |
| 10 |            | Adults      | 176 | 145 | 120 | 1.47   |
| 11 |            |             |     |     |     |        |
| 12 |            | Paediatric  | 18  | 20  | 84  | 0.21   |
| 13 | Newspapers |             |     |     |     | <0.001 |
| 14 |            | Both        | 22  | 33  | 43  | 0.51   |
| 15 |            |             |     |     |     |        |
| 16 |            | Unspecified | 41  | 37  | 50  | 0.82   |
| 17 |            |             |     |     |     |        |
| 18 |            |             |     |     |     |        |
| 19 |            |             |     |     |     |        |
| 20 |            |             |     |     |     |        |

21 \* Statistically significant differences in effect distributions related to types of  
 22  
 23 article were also observed in UK newspaper articles (P<0.001), and in NL  
 24  
 25 newspaper articles (P=0.011).  
 26  
 27  
 28  
 29  
 30  
 31  
 32  
 33  
 34  
 35  
 36  
 37  
 38  
 39  
 40  
 41  
 42  
 43  
 44  
 45  
 46  
 47  
 48  
 49  
 50  
 51  
 52  
 53  
 54  
 55  
 56  
 57  
 58  
 59  
 60

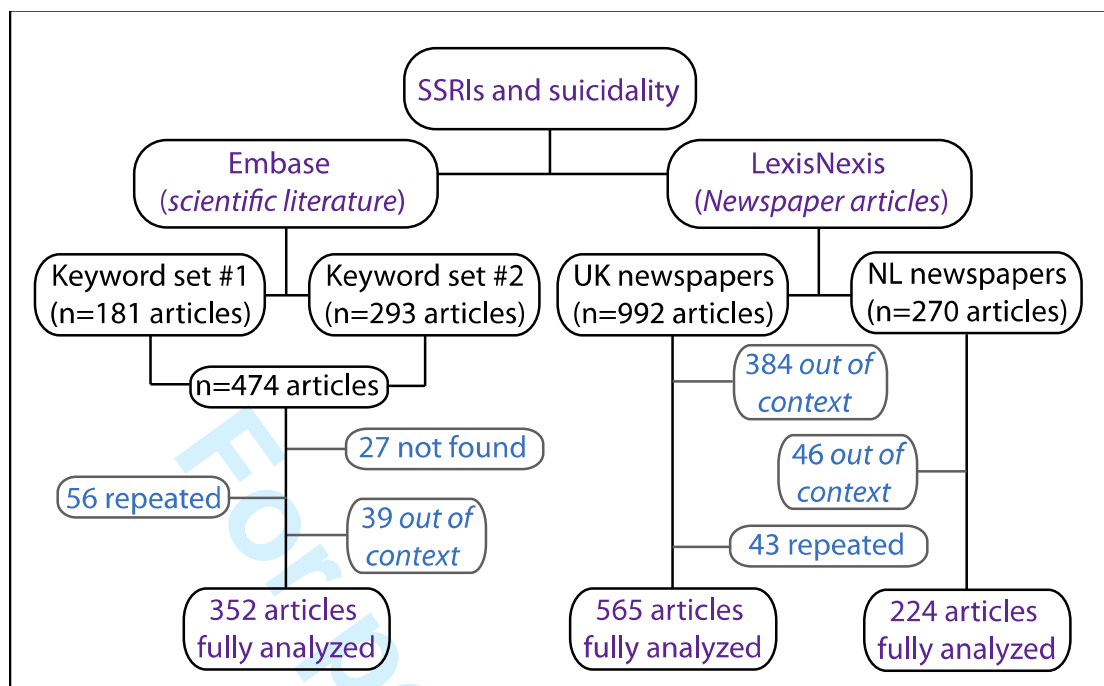

Figure 1. Scheme of the search process performed in the scientific and medical literature and in NL & UK newspapers.

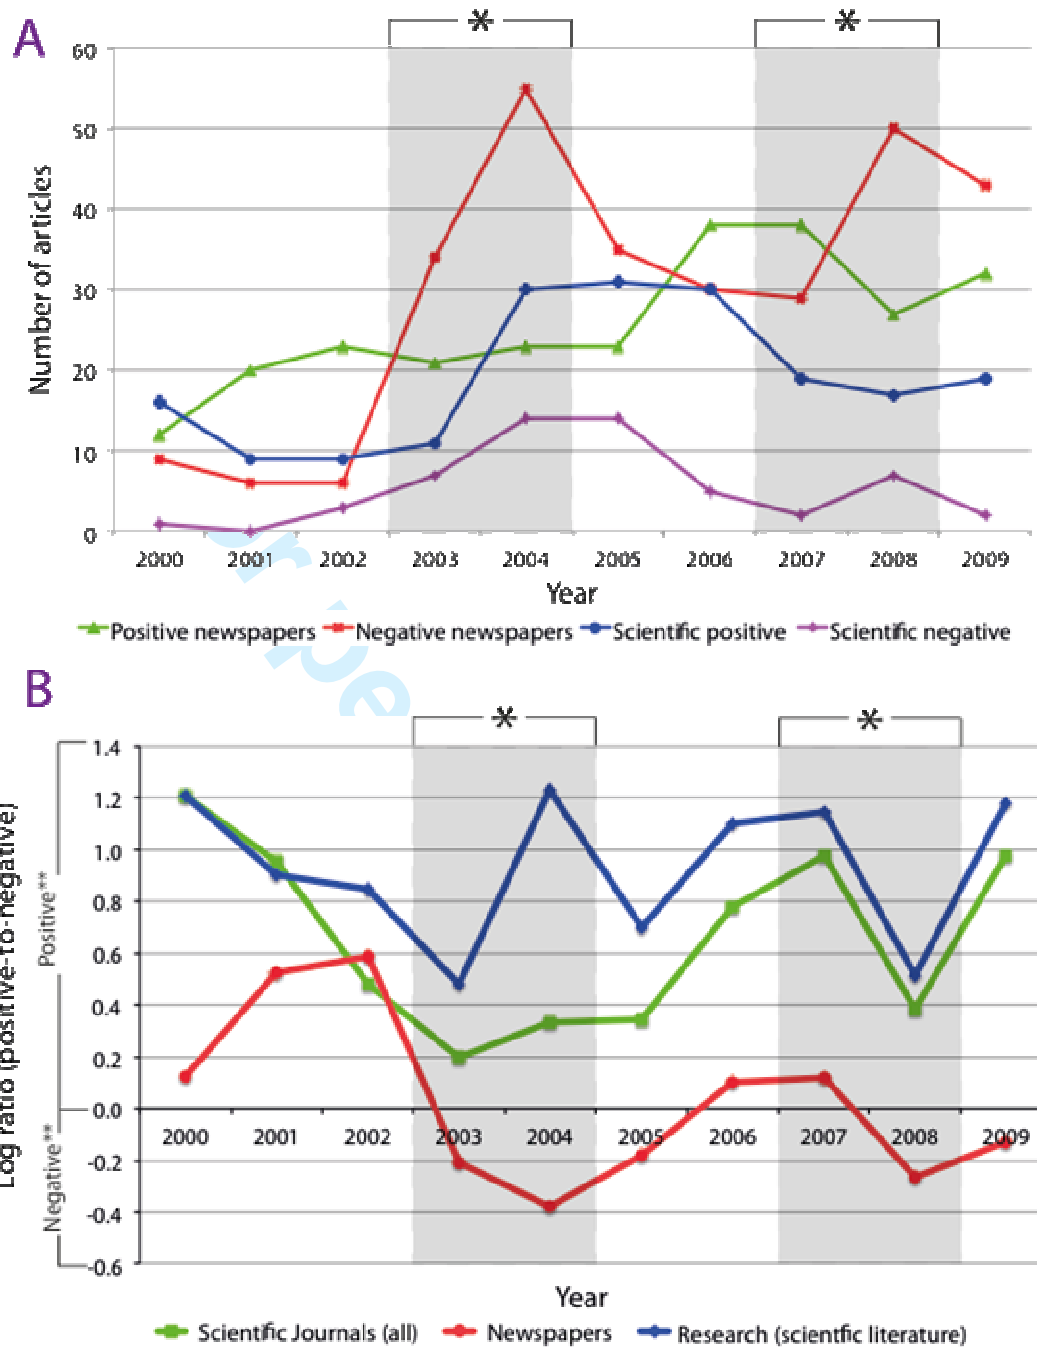

Figure 2. (A) Effect messages (positive and negative) organized along the research period, per year (2000–2009) and according to the source (scientific-medical journals and newspapers). (B) The natural logarithm of the positive-to-negative ratio was calculated and also plotted for the accumulated scientific-medical articles (green line), accumulated newspaper articles (red line), and solely research articles from the scientific-medical literature (dark blue line). \*The grey zone illustrates the period where most of the regulatory warnings were issued. \*\*Articles with a positive-



1  
2  
3 effect trend are located above zero, whilst articles conveying a negative-effect trend are located  
4  
5 underneath zero.  
6  
7  
8  
9  
10  
11  
12  
13  
14  
15  
16  
17  
18  
19  
20  
21  
22  
23  
24  
25  
26  
27  
28  
29  
30  
31  
32  
33  
34  
35  
36  
37  
38  
39  
40  
41  
42  
43  
44  
45  
46  
47  
48  
49  
50  
51  
52  
53  
54  
55  
56  
57  
58  
59  
60

For peer review only

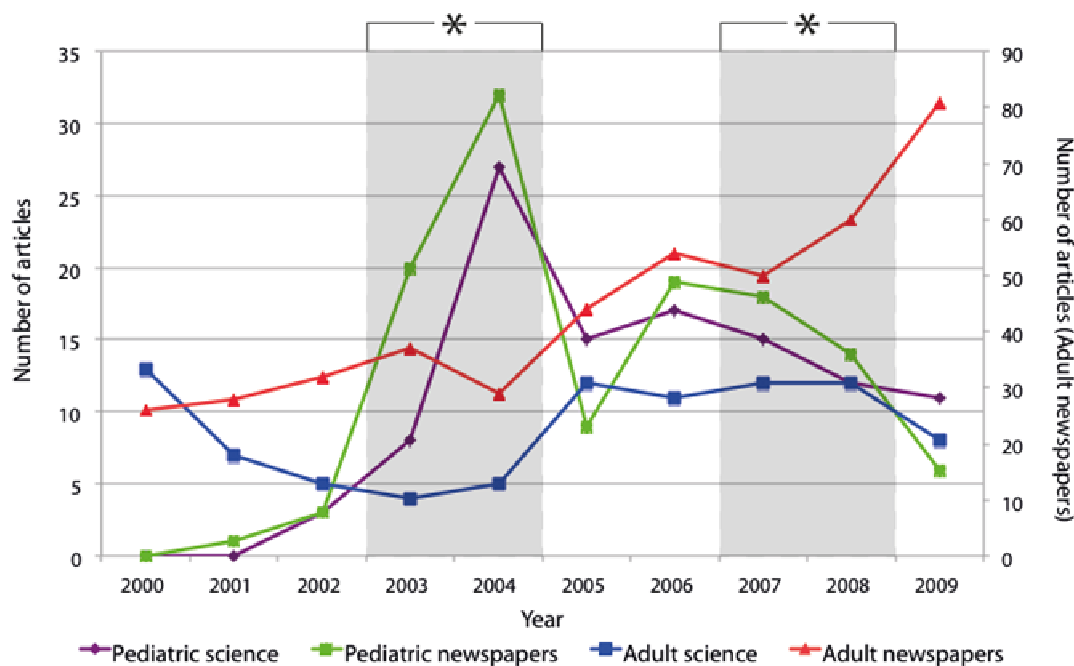

Figure 3. Articles indexed into age groups (paediatric and adult) in scientific-medical journals and in newspapers from 2000 to 2009. The scale of newspaper articles on adults is portrayed on the right y-axis. \*The grey zone illustrates the period where most of the regulatory warnings were issued.

**Author's contributions:** All authors were involved in the design of the study, review of earlier versions of the manuscript, and providing final approval for submission. JFH was responsible for the collection, analysis (also statistical), and interpretation of the data, as well as drafting, and revising the manuscript. TP was responsible for the analysis and interpretation of the data, drafting supervision, and revision. SVB provided support with the statistical analyses, as well.

**Competing interests:** JAMR is part-time professor at the Utrecht University and vice-president external scientific collaborations for GSK in Europe, and holds stock in GSK. All other authors declare no personal conflict of interest relevant to

1  
2  
3 the subject matter or materials discussed in the manuscript. This study was  
4 performed in the context of the Escher project (T6–202), a project of the Dutch  
5 Top Institute Pharma. The Division of Pharmacoepidemiology and Clinical  
6 Pharmacology, employing authors JFH, AKM, SVB, JAMR, and TP, has received  
7 unrestricted funding for pharmacoepidemiological research from  
8 GlaxoSmithKline (GSK), the private–public funded Top Institute Pharma  
9 (www.tipharma.nl, includes co–funding from universities, government, and  
10 industry), the Dutch Medicines Evaluation Board, and the Dutch Ministry of  
11 Health.  
12  
13  
14  
15  
16  
17  
18  
19  
20  
21  
22  
23  
24

25 **Role of the funding source:** None to declare.  
26  
27  
28  
29  
30  
31  
32  
33  
34  
35  
36  
37  
38  
39  
40  
41  
42  
43  
44  
45  
46  
47  
48  
49  
50  
51  
52  
53  
54  
55  
56  
57  
58  
59  
60

## References

- 1 Wilson A, Bonevski B, Jones A, Henry D. Media reporting of health interventions: signs of improvement, but major problems persist. *PLoS One* 2009;4(3):e4831.
- 2 Moynihan R, Bero L, Ross-Degnan D, Henry D, Lee K, Watkins J, et al. Coverage by the news media of the benefits and risks of medications. *N Engl J Med* 2000;342(22):1645-50.
- 3 Ries NM, Rachul C, Caulfield T. Newspaper reporting on legislative and policy interventions to address obesity: United States, Canada, and the United Kingdom. *J Public Health Policy* 2011;32(1):73-90.
- 4 Bartlett C, Sterne J, Egger M. What is newsworthy? Longitudinal study of the reporting of medical research in two British newspapers. *BMJ* 2002;325(7355):81-4.
- 5 Entwistle V. Reporting research in medical journals and newspapers. *BMJ* 1995;310(6984):920-3.
- 6 Van Trigt AM, De Jong-Van Den Berg LTW, Voogt LM, Willems J, T.Dirk Tromp FJ, Haaijer-Ruskamp FM. Setting the agenda: Does the medical literature set the agenda for articles about medicines in the newspapers? *Soc Sci Med* 1995;41(16):893-9.
- 7 Dentzer S. Communicating Medical News — Pitfalls of Health Care Journalism. *N Engl J Med* 2009;360(1):1-3.
- 8 David F, Archer MD. Medical decisions regarding hormone therapy for menopausal women are significantly influenced by the media. *Pharmacoepidemiol Drug Saf.* 2007;16(1):28-31.

1  
2  
3  
4 9 Williams D, Kelly A, Feely J. Influence of media and regulatory changes on  
5  
6 prescribing of Cotrimoxazole and Trimethoprim in Ireland. *Pharmacoepidemiol*  
7  
8 *Drug Saf.* 2000;9(4):313-7.

9  
10 10 Mebane FE. The importance of news media in pharmaceutical risk  
11  
12 communication: proceedings of a workshop. *Pharmacoepidemiol Drug Saf.*  
13  
14 2005;14(5):297-306.

15  
16  
17 11 Grilli R, Ramsay C, Minozzi S. Mass media interventions: effects on health  
18  
19 services utilisation. *Cochrane Database Syst Rev.* 2002(1):CD000389.

20  
21  
22 12 Danovaro-Holliday MC, Wood AL, LeBaron CW. Rotavirus vaccine and the  
23  
24 news media, 1987-2001. *JAMA* 2002;287(11):1455-62.

25  
26  
27 13 FDA. Suicidality in Children and Adolescents Being Treated With  
28  
29 Antidepressant Medications. Rockville, MD: Department of Health and Human  
30  
31 Services, 2004.

32  
33  
34 [http://www.fda.gov/Drugs/DrugSafety/PostmarketDrugSafetyInformationforPa](http://www.fda.gov/Drugs/DrugSafety/PostmarketDrugSafetyInformationforPatientsandProviders/DrugSafetyInformationforHealthcareProfessionals/PublicHealthAdvisories/ucm161679.htm)  
35  
36 [tientsandProviders/DrugSafetyInformationforHealthcareProfessionals/PublicHe](http://www.fda.gov/Drugs/DrugSafety/PostmarketDrugSafetyInformationforPatientsandProviders/DrugSafetyInformationforHealthcareProfessionals/PublicHealthAdvisories/ucm161679.htm)  
37  
38 [althAdvisories/ucm161679.htm](http://www.fda.gov/Drugs/DrugSafety/PostmarketDrugSafetyInformationforPatientsandProviders/DrugSafetyInformationforHealthcareProfessionals/PublicHealthAdvisories/ucm161679.htm) (accessed January 20, 2011).

39  
40  
41 14 EMA. European Medicines Agency finalises review of antidepressants in  
42  
43 children and adolescents. London: EMA, 2005.

44  
45  
46 [http://www.ema.europa.eu/ema/index.jsp?curl=pages/news\\_and\\_events/news](http://www.ema.europa.eu/ema/index.jsp?curl=pages/news_and_events/news/2009/12/news_detail_000882.jsp&murl=menus/news_and_events/news_and_events.jsp&mid=WC0b01ac058004d5c1)  
47  
48 [/2009/12/news\\_detail\\_000882.jsp&murl=menus/news\\_and\\_events/news\\_and](http://www.ema.europa.eu/ema/index.jsp?curl=pages/news_and_events/news/2009/12/news_detail_000882.jsp&murl=menus/news_and_events/news_and_events.jsp&mid=WC0b01ac058004d5c1)  
49  
50 [events.jsp&mid=WC0b01ac058004d5c1](http://www.ema.europa.eu/ema/index.jsp?curl=pages/news_and_events/news/2009/12/news_detail_000882.jsp&murl=menus/news_and_events/news_and_events.jsp&mid=WC0b01ac058004d5c1) (accessed February 4, 2011).

51  
52  
53 15 MHRA. Report of the CSM Expert Working Group on the Safety of Selective  
54  
55 Serotonin Reuptake Inhibitor Antidepressants. London: Committee on Safety of  
56  
57 Medicines, 2004.  
58  
59  
60

1  
2  
3 [http://www.ema.europa.eu/docs/en\\_GB/document\\_library/Report/2010/01/WC500054061.pdf](http://www.ema.europa.eu/docs/en_GB/document_library/Report/2010/01/WC500054061.pdf) (accessed February 4, 2011).

7  
8 16 Cheung A, Sacks D, Dewa CS, Pong J, Levitt A. Paediatric prescribing  
9 practices and the FDA Black-box warning on antidepressants. Journal of  
10 developmental and behavioral paediatrics : JDBP 2008;29(3):213-5.  
11  
12

13  
14 17 Wheeler BW, Gunnell D, Metcalfe C, Stephens P, Martin RM. The  
15 population impact on incidence of suicide and non-fatal self harm of regulatory  
16 action against the use of selective serotonin reuptake inhibitors in under 18s in  
17 the United Kingdom: Ecological study. BMJ 2008;336(7643):542-5.  
18  
19  
20  
21  
22

23  
24 18 BBC. Panorama: The Secrets of Seroxat. London: BBC, 2002.  
25  
26 [http://news.bbc.co.uk/panorama/hi/front\\_page/newsid\\_8425000/8425414.stm](http://news.bbc.co.uk/panorama/hi/front_page/newsid_8425000/8425414.stm)  
27 (accessed February 7, 2011).  
28  
29

30  
31 19 Olsen AK, Whalen MD. Public perceptions of the pharmaceutical industry  
32 and drug safety: implications for the pharmacovigilance professional and the  
33 culture of safety. Drug Saf. 2009;32(10):805-10.  
34  
35  
36  
37

38  
39 20 Ravindran LN, Stein MB. The pharmacologic treatment of anxiety  
40 disorders: a review of progress. J Clin Psychiatry 2011;71(7):839-54.  
41  
42

43  
44 21 Department of statistics UK, 2010.  
45  
46 <http://www.statistics.gov.uk/cci/nugget.asp?id=6> (accessed August 20, 2010).  
47  
48

49  
50 22 CBS. Bevolkingsteller (Centrale Bureau van Statistiek), 2010.  
51  
52 <http://www.cbs.nl/en-GB/menu/themas/bevolking/cijfers/extra/bevolkingsteller.htm> (accessed  
53  
54  
55  
56  
57  
58  
59  
60 August 20, 2010).

- 1  
2  
3  
4 23 Turner EH, Matthews AM, Linardatos E, Tell RA, Rosenthal R. Selective  
5  
6 publication of antidepressant trials and its influence on apparent efficacy. *N Engl*  
7  
8 *J Med* 2008;358(3):252-60.
- 9  
10 24 EMA. CHMP Assessment Report on Antidepressants. London: EMA, 2008.  
11  
12 [http://www.ema.europa.eu/docs/en\\_GB/document\\_library/Report/2010/01/](http://www.ema.europa.eu/docs/en_GB/document_library/Report/2010/01/WC500054061.pdf)  
13  
14 [WC500054061.pdf](http://www.ema.europa.eu/docs/en_GB/document_library/Report/2010/01/WC500054061.pdf) (accessed February 7, 2011).
- 15  
16  
17 25 Franklin B, Hamer M, Hanna M, Kinsey M, Richardson J. Key concepts in  
18  
19 journalism studies. Sage: London, Thousand Oaks, California: Sage 2005.
- 20  
21 26 Iggers J. Good news, bad news: journalism ethics and the public interest.  
22  
23 Schiller HI, editor. Boulder, Colorado: Westview press, 1999.
- 24  
25  
26 27 Koren G, Klein N. Bias against negative studies in newspaper reports of  
27  
28 medical research. *JAMA* 1991;266(13):1824-6.
- 29  
30  
31 28 FDA. Antidepressant Use in Children, Adolescents, and Adults. Rockville,  
32  
33 MD: Department of Health and Human Services, 2007.  
34  
35 [http://www.fda.gov/Drugs/DrugSafety/InformationbyDrugClass/ucm096273.h](http://www.fda.gov/Drugs/DrugSafety/InformationbyDrugClass/ucm096273.htm)  
36  
37 [tm](http://www.fda.gov/Drugs/DrugSafety/InformationbyDrugClass/ucm096273.htm) (accessed February 7, 2011).
- 38  
39  
40 29 Burns RB, Moskowitz MA, Osband MA, Kazis LE. Newspaper reporting of  
41  
42 the medical literature. *J Gen Intern Med* 1995;10(1):19-24.
- 43  
44  
45 30 Karacsony A, Rosenbaum J. Recapturing the vision: restoring trust in the  
46  
47 pharmaceutical industry by translating expectations into actions, 2007.  
48  
49 [http://www.pwc.com/gx/en/pharma-life-sciences/pharmaceutical-industry-](http://www.pwc.com/gx/en/pharma-life-sciences/pharmaceutical-industry-thought-leadership.jhtml)  
50  
51 [thought-leadership.jhtml](http://www.pwc.com/gx/en/pharma-life-sciences/pharmaceutical-industry-thought-leadership.jhtml) (accessed July 21, 2011).
- 52  
53  
54 31 Pirkis J, Blood RW. Suicide and the media. Part I: Reportage in  
55  
56 nonfictional media. *Crisis* 2001;22(4):146-54.  
57  
58  
59  
60

1  
2  
3 32 Martin RM, May M, Gunnell D. Did intense adverse media publicity impact  
4 on prescribing of paroxetine and the notification of suspected adverse drug  
5 reactions? Analysis of routine databases, 2001-2004. Br J Clin Pharmacol.  
6  
7  
8  
9  
10 2006;61(2):224-8.  
11  
12  
13  
14  
15  
16  
17  
18  
19  
20  
21  
22  
23  
24  
25  
26  
27  
28  
29  
30  
31  
32  
33  
34  
35  
36  
37  
38  
39  
40  
41  
42  
43  
44  
45  
46  
47  
48  
49  
50  
51  
52  
53  
54  
55  
56  
57  
58  
59  
60

For peer review only



**Please note:** BMJ Group requires compliance to the following reporting guidelines, please upload your completed check-list with your submission and label it " Research checklist":

**Guidance and forms are available [here](#)**

- CONSORT statement - *Required for all randomised controlled trials*
- PRISMA statement - *Required for all systematic reviews*
- EVEREST statement - *Required for all economic evaluations*
- STARD statement - *Required for all diagnostic research papers*
- STROBE statement - *Required for all observational studies*
- MOOSE statement - *Required for all meta-analyses of observational studies*

For peer review only

1  
2  
3  
4  
5  
6  
7  
8  
9  
10  
11  
12  
13  
14  
15  
16  
17  
18  
19  
20  
21  
22  
23  
24  
25  
26  
27  
28  
29  
30  
31  
32  
33  
34  
35  
36  
37  
38  
39  
40  
41  
42  
43  
44  
45  
46  
47  
48  
49  
50  
51  
52  
53  
54  
55  
56  
57  
58  
59  
60

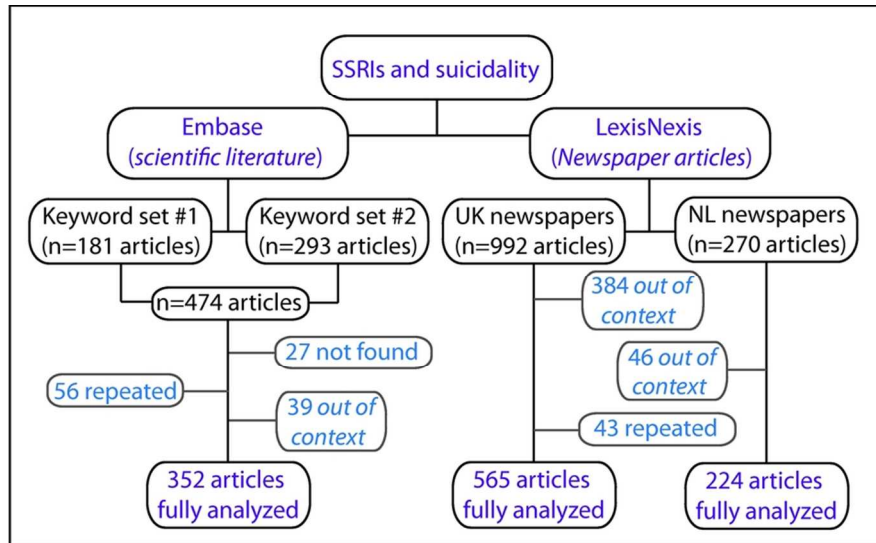

92x49mm (300 x 300 DPI)

review only

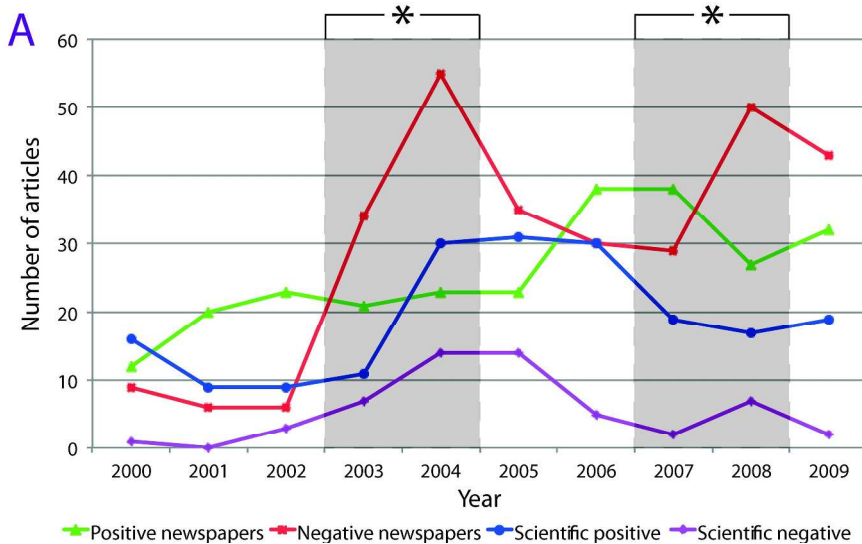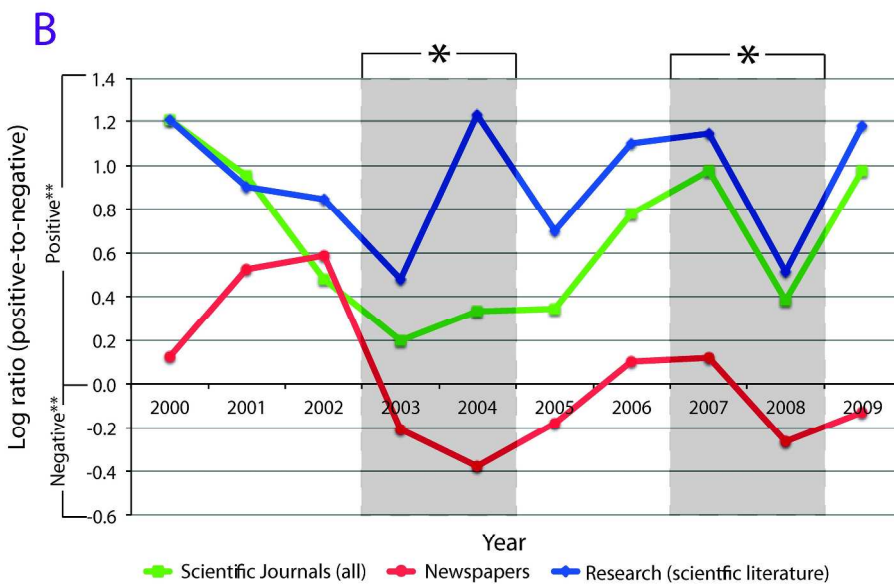

267x344mm (300 x 300 DPI)

1  
2  
3  
4  
5  
6  
7  
8  
9  
10  
11  
12  
13  
14  
15  
16  
17  
18  
19  
20  
21  
22  
23  
24  
25  
26  
27  
28  
29  
30  
31  
32  
33  
34  
35  
36  
37  
38  
39  
40  
41  
42  
43  
44  
45  
46  
47  
48  
49  
50  
51  
52  
53  
54  
55  
56  
57  
58  
59  
60

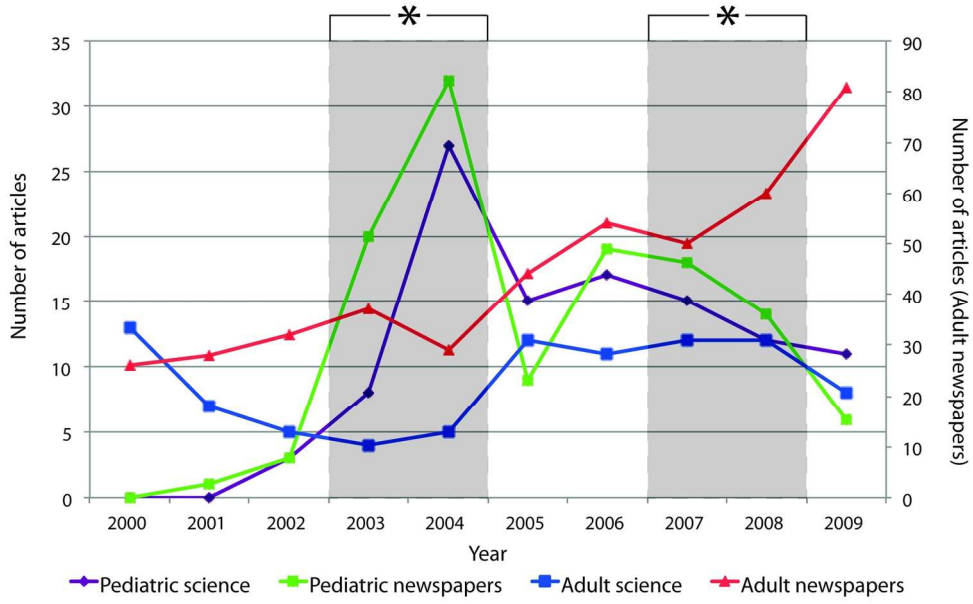

158x97mm (300 x 300 DPI)

Review only

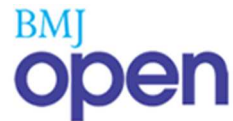

**Publication trends in newspapers and scientific journals for SSRI and suicidality: a systematic longitudinal study**

|                                 |                                                                                                                                                                                                                                                                                                                                                                                                                                                                                                                                                                                                                                                                     |
|---------------------------------|---------------------------------------------------------------------------------------------------------------------------------------------------------------------------------------------------------------------------------------------------------------------------------------------------------------------------------------------------------------------------------------------------------------------------------------------------------------------------------------------------------------------------------------------------------------------------------------------------------------------------------------------------------------------|
| Journal:                        | <i>BMJ Open</i>                                                                                                                                                                                                                                                                                                                                                                                                                                                                                                                                                                                                                                                     |
| Manuscript ID:                  | bmjopen-2011-000290.R1                                                                                                                                                                                                                                                                                                                                                                                                                                                                                                                                                                                                                                              |
| Article Type:                   | Research                                                                                                                                                                                                                                                                                                                                                                                                                                                                                                                                                                                                                                                            |
| Date Submitted by the Author:   | 07-Sep-2011                                                                                                                                                                                                                                                                                                                                                                                                                                                                                                                                                                                                                                                         |
| Complete List of Authors:       | Hernandez, Francisco; Utrecht University, Pharmacoepidemiology & Clinical Pharmacology<br>Mantel-Teeuwisse, Aukje; Utrecht University, Pharmacoepidemiology & Clinical Pharmacology<br>van Thiel, Ghislaine; University Medical Centre Utrecht, Julius Centre for Health Sciences and Primary Care<br>Belitser, Svetlana; Utrecht University, Pharmacoepidemiology & Clinical Pharmacology<br>Raaijmakers, Jan; Utrecht University, Pharmacoepidemiology & Clinical Pharmacology; GlaxoSmithKline, External Scientific Collaborations Europe<br>Pieters, Toine; Utrecht University, Pharmacoepidemiology & Clinical Pharmacology; VU Medical Centre Amsterdam, EMGO |
| <b>Primary Subject Heading</b>: | Health services research                                                                                                                                                                                                                                                                                                                                                                                                                                                                                                                                                                                                                                            |
| Secondary Subject Heading:      |                                                                                                                                                                                                                                                                                                                                                                                                                                                                                                                                                                                                                                                                     |
| Keywords:                       | newspapers, SSRIs, suicidality, scientific literature, dissemination, coverage                                                                                                                                                                                                                                                                                                                                                                                                                                                                                                                                                                                      |
|                                 |                                                                                                                                                                                                                                                                                                                                                                                                                                                                                                                                                                                                                                                                     |

SCHOLARONE™  
Manuscripts

1  
2 **Publication trends in newspapers and scientific journals for SSRIs and**  
3  
4 **suicidality: a systematic longitudinal study**  
5

6  
7 **J.F. Hernandez<sup>1</sup>, A.K. Mantel-Teeuwisse<sup>1</sup>, G.J.M.W. van Thiel<sup>2</sup>, S.V. Belitser<sup>1</sup>, J.A.M.**  
8  
9 **Raaijmakers<sup>1,4</sup>, T. Pieters<sup>1,3</sup>**

10  
11 *<sup>1</sup>Department of Pharmacoepidemiology & Clinical Pharmacology, Utrecht Institute*  
12 *for Pharmaceutical Sciences (UIPS), Utrecht University, David de Wied building,*  
13 *Universiteitsweg 99, 3584 CG Utrecht, P.O. Box 80082, Utrecht, the Netherlands*

14  
15 *<sup>2</sup>Julius Centre for Health Sciences and Primary Care, University Medical Centre*  
16 *Utrecht, Universiteitsweg 100, 3584 CG Utrecht, P.O. Box 85500, 3508 GA Utrecht,*  
17 *The Netherlands*

18  
19 *<sup>3</sup>EMGO, VU Medical Centre, Amsterdam, Van der Boechorststraat 7, 1081 BT*  
20 *Amsterdam, The Netherlands*

21  
22 *<sup>4</sup>GlaxoSmithKline, External Scientific Collaborations Europe, Huis ter Heideweg 62,*  
23 *3705 LZ Zeist, P.O. Box 780, 3700 AT Zeist, Zeist, the Netherlands*

24  
25  
26  
27  
28  
29  
30  
31  
32  
33  
34  
35 Correspondence to: Prof. Dr. Toine Pieters

36  
37 Utrecht Institute for Pharmaceutical Sciences (UIPS), Division of  
38 Pharmacoepidemiology & Clinical Pharmacology; P.O. Box 80 082, 3584 CG  
39 Utrecht, the Netherlands. Tel.: +31 30 253 7324; fax: +31 30 253 9166. E-mail  
40  
41 address: [t.pieters@uu.nl](mailto:t.pieters@uu.nl)

42  
43  
44  
45 Keywords: newspapers, SSRIs, suicidality, scientific literature, dissemination,  
46  
47 coverage.

48  
49 Short title: Publication trends in newspapers and scientific journals for SSRIs &  
50  
51 suicidality.  
52  
53  
54  
55  
56  
57  
58  
59  
60

1  
2  
3 Word count (excluding title page, abstract, references, figures and tables): 2758  
4 words.  
5  
6  
7

8  
9 “The Corresponding Author has the right to grant on behalf of all authors and  
10 does grant on behalf of all authors, a worldwide licence to the Publishers and its  
11 licensees in perpetuity, in all forms, formats and media (whether known now or  
12 created in the future), to i) publish, reproduce, distribute, display and store the  
13 Contribution, ii) translate the Contribution into other languages, create  
14 adaptations, reprints, include within collections and create summaries, extracts  
15 and/or, abstracts of the Contribution, iii) create any other derivative work(s)  
16 based on the Contribution, iv) to exploit all subsidiary rights in the Contribution,  
17 v) the inclusion of electronic links from the Contribution to third party material  
18 where-ever it may be located; and, vi) licence any third party to do any or all of  
19 the above.”  
20  
21  
22  
23  
24  
25  
26  
27  
28  
29  
30  
31  
32  
33  
34  
35  
36  
37  
38  
39  
40  
41  
42  
43  
44  
45  
46  
47  
48  
49  
50  
51  
52  
53  
54  
55  
56  
57  
58  
59  
60

## Abstract

**Background:** In the period 2003–2008, the regulatory authorities issued several warnings restricting the use of SSRIs in paediatrics, in reaction to safety concerns regarding the risk of suicidality. In this study, the SSRIs and suicidality controversy serves as a template to analyse the long-term publication trends regarding the benefit/risk profile of medications. The aim is to ascertain differences (in terms of numbers, categories and timing) between negative and positive newspaper and journal articles on SSRIs and suicidality, and ascertain correlations between changes in the reports and regulatory warnings.

Deleted: d

Deleted: dissemination dynamics of

**Methods:** A systematic review of scientific articles (Embase), and NL and UK newspapers (LexisNexis) was performed between 2000-2010. Categorization was done by 'effect' (related treatment effect), 'type of article' and 'age group'. The articles' positive-to-negative effect ratio was determined. Differences in distribution of 'effect' categories were analysed across sources, 'type of article', and 'age group' using the Mann-Whitney (2 sub-groups) or Kruskal-Wallis test (3 or more).

**Findings:** In total, 1141 articles were categorized: 352 scientific, 224 Dutch, and 565 British newspaper articles. Scientific articles were predominantly on research and were positive, whereas newspaper articles were negative (ratios=3.50-scientific, 0.69-NL and 0.94-UK;  $P<0.001$ ). Articles on paediatrics were less positive in scientific journals and more negative in newspapers (ratios=2.29-scientific, 0.26-NL, and 0.20-UK;  $P<0.001$ ), while articles on adults were positive overall (ratios=10.0-scientific, 1.06-NL, and 1.70-UK;  $P<0.001$ ). In addition, negative-effect reporting trends were exacerbated following regulatory



1  
2 warnings and were generally opinion articles, both in scientific journals and  
3  
4 newspapers (2003/4 and after 2007).  
5

6 **Interpretation:** [We found a positive publication tendency inherent in journal](#)  
7 [research articles. This apparent positive publication bias present in scientific](#)  
8 [journals, however, does not seem to prevent the dissemination of 'bad' news](#)  
9 [about medications. The negative tendency present in Dutch and British](#)  
10 [newspapers was perceivable in the paediatrics group and during the warnings,](#)  
11 [indicating that national news media have informed the public about this](#)  
12 [international drug safety controversy on time.](#)  
13  
14  
15  
16  
17  
18  
19  
20  
21  
22  
23  
24  
25  
26  
27  
28  
29  
30  
31  
32  
33  
34  
35  
36  
37  
38  
39  
40  
41  
42  
43  
44  
45  
46  
47  
48  
49  
50  
51  
52  
53  
54  
55  
56  
57  
58  
59  
60

**Deleted:** 'Good' news in scientific journals is determined by a positive bias in research reporting, however, based on clinical studies outcomes, whereas 'bad' news is related to opinion. Scientific journals and newspapers coincided in the nature and timing of opinion articles. The increase of negative-effect articles in scientific journals and newspapers following regulatory warnings indicates that the public has been informed in a timely fashion.

## Introduction

The news media are an important source of information about therapeutic drugs and health.[1] Coverage varies from communicating the benefits and risks of medications, to drug regulation and litigation, among others.[2,3] Scientific journals are a significant source of information for journalists writing about medicine.[4] However, this does not necessarily mean that 'good' or 'bad' news about medicines in the news media is determined by the scientific literature.[4,5] The 'good' news and 'bad' news in both news media and scientific and medical journals may be in agreement, but may also differ dramatically depending on the situation.[6,7]

Health care providers and consumers alike seek medical information from the news media and act on it accordingly, changing their perceptions and behaviour.[8,9] Coverage of medical news exemplifies how information from the news media and scientific journals can have a significant impact, yet be confusing.[7,10,11] Most newspapers' coverage studies of the benefits and risks of medications, although valuable, are short-term and lack a comparative perspective among countries.[2,8,12] In this study, [we analyzed the long-term publication trends regarding the benefit/risk profile of medications in the context of the SSRIs and suicidality controversy \(see box\) from 2000 to 2010 in scientific journals and newspapers in the Netherlands \(NL\) and in the United Kingdom \(UK\). The aim is to ascertain the differences \(in terms of numbers, categories, and timing\) between negative and positive newspaper and scientific journal articles on SSRIs and suicidality.](#)

**Deleted:** Given the media's impact on public perceptions, which in turn might affect public trust in drug governance, health care providers, consumers and regulators should have a better understanding of the distinct process of knowledge dissemination by scientific journals compared to newspapers. The dissemination dynamics of 'bad' and 'good' news might differ when taking into account long-term reporting trends using a comparative perspective and during a drug safety controversy.

**Deleted:** serves as an example to study the long-term dissemination dynamics of the benefits and risks of medications. Hence, the characteristics and dynamics of coverage on SSRIs and suicidality by scientific and medical journals and newspapers in NL and in UK were assessed from 2000 to 2010.

**Formatted:** Highlight

**Formatted:** Highlight

### The SSRIs and suicidality controversy

In the period 2003–2008, regulatory authorities (FDA, MHRA and EMA, among others) issued several warnings restricting the use of SSRIs in paediatrics, in reaction to safety concerns regarding suicidal ideation.[13–15] While some scientists adulated the warnings, others expressed their concerns about the implied consequences.[16,17] The safety issue arose following GlaxoSmithKline's (GSK) request for a 6-month market exclusivity extension with the FDA for the use of paroxetine (a SSRI) to treat paediatric depression in response to the Food and Drug Administration Modernization Act (FDAMA). Consequently, GSK submitted the results from unpublished paediatric clinical data to the FDA. Meanwhile, the BBC aired a documentary entitled 'The secrets of Seroxat' on October 13 2002 in which it was alleged that internal documents of GSK showed that the dissemination of trial data on paroxetine in childhood depression was spun 'to minimize any negative commercial impact'.[18] GSK was accused of underplaying the association between SSRIs and suicidality. The ensuing worldwide media exposure played a role in driving the SSRI suicide controversy. In the process, confidence in the pharmaceutical industry and regulatory authorities decreased significantly.[19] To date, the controversy remains unsettled, albeit evidence also suggests that SSRIs are useful first-line treatments for depression and most anxiety disorders but exhaustive monitoring is recommended during the initiating phase.[20]

### Methods

### Time frame

Content analysis was performed on articles published in the period January 2000 to December 2009, including the period in which the regulatory warnings were repeatedly enforced, i.e., 2003/4 and 2007.

### Data sources

Scientific articles were extracted from Embase (compilation of Medline and 2000 extra journals not covered by Medline) using two sets of keywords, i.e., first: 'serotonin uptake inhibitor' NOT 'serotonin noradrenalin reuptake inhibitor' AND 'suicidal behavior' or 'automutilation' or 'aggression' AND 'depression'; and second: 'serotonin uptake inhibitor' NOT 'serotonin noradrenalin reuptake inhibitor' AND 'suicide'. The search was limited to 'humans', and 'Dutch' and 'English' language.

Newspapers articles were extracted using the LexisNexis database from a selection of high-circulation newspapers in NL (n=six) and in UK (n=four). The newspapers analysed were: *De Telegraaf*, *Algemeen Dagblad*, *De Volkskrant*, *NRC Handelsblad*, *Trouw* and *Het Parool* for NL; and *The Sun*, *Daily Mail*, *The Daily Telegraph* and *The Times* for UK. The newspapers' circulation figures (per country) covered 11% of each total resident population.[21,22] Search queries were performed in the language of the papers (Dutch and English). Dutch articles were retrieved using the terms 'antidepressiv!' or 'anti-depressiv!' or 'SSRI!' or 'serotonine!' AND 'zelfmoord!' or 'aggressi!' or 'geweld!' or 'kwaad!' or 'suicid!' AND 'depressi!'. British articles were extracted using the terms 'antidepress!' or 'anti-depress!' or 'SSRI!' or 'serotonin!' AND 'suicid!' or 'aggressi!' or 'violen!' or 'harm!' AND 'depressi!'.

## Data classification

All articles addressing SSRIs, depression, suicidal thoughts, or suicide as the main topic were eligible for analysis. If that was not the case, such an article was categorized as 'out of context', e.g., articles reporting the use of SSRIs to treat premature ejaculation or neuralgia. All scientific and newspaper articles were analysed on the content of full-text, except for scientific articles where the abstract information was regarded as sufficient for categorization. The 'effect', 'type of article', and 'age group' categories were independently determined for these articles by two researchers.

The 'effect' category was divided into positive, neutral, and negative. Articles

reporting on positive therapeutic outcomes with no [mention of an association](#)

[between SSRIs and an increased risk on](#) suicidal behaviour were classified as

positive. Consequently, articles [affirmatively](#) reporting on the association

between SSRI use and suicidality, with [no mention of positive therapeutic](#)

outcomes, were classified as negative. Articles with a balanced message (positive

and negative effects) were classified as neutral. The 'type of article' category was

defined within scientific journals as: case study ([represents a descriptive and](#)

[intensive analysis of an individual](#) patient), research ([comprehends](#) study

results, such as RCTs ([randomized clinical trials](#)), meta-analyses, observational

studies ([multiple patients](#)), etc.), opinion ([enclose articles, such as](#) letters [to an](#)

[editor](#), commentaries, replies, etc.), and policy ([comprehends articles discussing](#)

regulatory-related [topics](#), etc.). The definition of 'type of article' in newspapers

was based on the nature [and elaboration](#) of the news [conveyed](#): interview

[comprehends articles where the journalist questioned the interviewee to](#)

[retrieve information](#)), opinion ([comprises articles where the author or journalist](#)

Deleted: confirmation of causality

Deleted: little or

Deleted: report

Deleted: 's

1  
2  
3 [portrayed his/her personal](#) perspective), news report ([covers general articles](#)  
4 [with](#) informative news or general journalism), science journalism ([comprehends](#)  
5 [articles presenting](#) scientific information or reports), and policy ([comprehends](#)  
6 [articles discussing regulatory-related topics, such as](#) reimbursement, change of  
7  
8  
9  
10 indication, etc.). Finally, the 'age group' category considered adults (above 18  
11  
12 years old), paediatric (18 years old or younger), both (adult and paediatric) or  
13  
14 unspecified.

15  
16  
17 Scoring discrepancies between the two researchers occurred in approximately  
18  
19 5% of all articles. In a case of discrepancy, the categorization of the article in  
20  
21 question was settled by consensus.  
22

### 23 24 **Data analysis**

25  
26 The positive-to-negative ratio of the 'effect' category was calculated (per source,  
27  
28 'type of article', and 'age group' categories). For the statistical analyses, the total  
29  
30 count of articles per category was used. Differences in distribution of the 'effect'  
31  
32 categories (positive, neutral and negative) were analysed across the sources  
33  
34 (Embase, Dutch and/or UK newspaper articles); 'type of article', and 'age group'  
35  
36 were analysed using the Mann-Whitney (2 sub-groups) or Kruskal-Wallis test  
37  
38 (3 or more). Statistical significance was defined as  $P < 0.05$ . Statistical analyses  
39  
40 were performed using SPSS software (release 18.0.3).  
41

42  
43 To assess the publication dynamics, the number of articles (in scientific journals  
44  
45 and/or in newspapers) was plotted per year (2000-2010), and per category  
46  
47 ('effect', 'type of article', or 'age group').  
48  
49

### 50 51 **Results**

52  
53  
54  
55  
56  
57  
58  
59  
60

1  
2  
3 A total of 1736 articles were retrieved based on the predefined key word sets. Of  
4 these, 1141 articles were fully categorized: 352 scientific, 224 Dutch newspaper  
5 articles and 565 British newspaper articles (Figure 1). The characteristics of the  
6 articles are listed in Table 1.  
7  
8  
9

### 10 11 **Publication patterns of the 'effect' category**

12  
13 Of all 1141 articles (scientific and newspapers), the positive-effect category  
14 (39%) was significantly larger than the negative-effect (31%) or the neutral-  
15 effect categories (30%;  $P < 0.001$ ). The differentiation of the 'effect' category by  
16 source showed that scientific journals were predominantly positive (ratio=3.5),  
17 whereas Dutch and British newspapers coverage of 'effect' was mainly negative  
18 (ratios=0.69-NL and 0.94-UK, Table 1). Statistically significant differences were  
19 observed in 'effect' classification for scientific journals and newspapers (both  
20  $P < 0.001$ ), but not between NL and UK dailies ( $P = 0.116$ , Table 2).  
21  
22  
23  
24  
25  
26  
27  
28  
29

30 Although the overall coverage of 'effect' was generally positive in scientific  
31 journals, temporal changes were observed in the positive-to-negative 'effect'  
32 ratio per year, indicating a less positive-effect trend during 2003/4 and after  
33 2007. Newspaper reporting revealed a similar trend as scientific journals.  
34 However, the positive-to-negative 'effect' ratio per year in newspapers shifted  
35 to the negative side from 2003 to 2005 and after 2007 (Figure 2B).  
36  
37  
38  
39  
40  
41

**Deleted:** This specific increase in negative-effect articles in newspapers was characterized by repetitive reports about lawsuits (e.g., lawyers' unsubstantiated claims of a causal association between murder and suicide attempts and the use of SSRIs), whistle-blowers or other media interventions, which fuelled the discussion.

### 42 43 **Publication patterns of the 'type of article' category**

44  
45 Scientific journals published generally research articles (60%), carrying a  
46 positive-effect message (ratio=8.5, Table 2). To a lesser extent, scientific journals  
47 published opinion articles (34%), which conveyed an overall positive-effect  
48 message (ratio=1.2, Table 2). However, scientific opinion articles displayed  
49  
50  
51  
52  
53  
54  
55  
56  
57  
58  
59  
60

1  
2 major temporal changes in the positive-to-negative 'effect' ratio following  
3 regulatory warnings, showing more negative-effect articles. Differences of  
4 'effect' distributions related to 'types of article' were statistically significant  
5 (P<0.001, Table 2).  
6  
7  
8  
9

**Deleted:** The nature of these articles was primarily criticism of methodological issues or the author's perspective on SSRIs.

10 Newspapers published mainly news report articles (50.5%) and carried an  
11 overall negative-effect message (ratio=0.5, Table 2). A similar negative-effect  
12 trend was measured in scientific journalism articles (ratio=0.7). Newspaper  
13 opinion articles also portrayed an overall positive-effect message (ratio=2.1), as  
14 observed for opinion articles in scientific journals (ratio=1.2, Table 2). Major  
15 temporal changes in the positive-to-negative 'effect' ratio of newspaper articles  
16 were visible in the period of regulatory warnings (2002-2005 and 2007-2008,  
17 Figure 2B). Differences between 'effect' distributions related to 'types of article'  
18 were statistically significant in the accumulated newspaper articles group, UK  
19 newspaper articles (P<0.001), and in NL newspaper articles (P=0.011).  
20  
21  
22  
23  
24  
25  
26  
27  
28  
29  
30  
31

### 32 **Publication patterns of the 'age group' category**

33  
34 Scientific journals reported more frequently on paediatrics (31%) than on adults  
35 (25%; P<0.001). Articles on adults were notably more positive concerning  
36 'effect' compared to paediatric articles (ratio=10 and 2.3, Table 2).  
37  
38

39  
40 Newspapers paid more attention to adults (56%) than paediatrics (15%, Table  
41 1). Reporting trend for articles on adults was primarily positive about 'effect',  
42 whereas those on paediatrics were mainly negative (ratio=1.5 and 0.2).  
43  
44 Significant differences were found between 'effect' distributions in newspapers  
45 related to 'age group' (P<0.001). Reporting patterns between NL and UK dailies  
46 were comparable in all three categories (P=0.116, Table 2).  
47  
48  
49  
50  
51  
52  
53  
54  
55  
56  
57  
58  
59  
60



Articles on paediatrics in scientific journals and in newspapers displayed similar publication dynamics, i.e., a significant peak in 2004, following the warnings. The publication dynamics of articles on adults in scientific journals and newspapers also showed a similar pattern. Thereafter, newspaper articles on adults continued to increase until 2010, while their scientific counterparts remained more or less stable (Figure 3).

## Discussion

This study assessed the characteristics and dynamics of SSRIs and suicidality coverage by scientific and medical journals in general, and newspapers in NL and UK from 2000 to 2010. Scientific journals published predominantly research articles about positive therapeutic outcomes with little mention of [an association between SSRIs and suicidality, particularly in adults](#). Despite different ethnic backgrounds (e.g., tabloid culture in UK, among others) and language, newspaper reporting trends in NL and UK were comparable; and were overall negative regarding the therapeutic effect of SSRIs in paediatrics, while positive-effect reporting prevailed for adults.

The present study has several limitations. It covered 11% of the total population per country based on newspaper circulation figures. Nevertheless, the [random sample is representative \(n=789 newspaper articles\) given the aim to ascertain differences \(in terms of numbers, categories, and timing\) between negative and positive newspaper and journal articles on SSRIs and suicidality. The categories 'effect' and 'type of article' might be limited by our definition, and their interpretation could differ between readers. We attempted to avoid subjectivity by analysing the data independently by two researchers. We achieved more than](#)

**Deleted:** causality

**Deleted:** size might be

**Deleted:** since we aimed to understand the type and quantity of information the public receives. Although reporting trends between countries were comparable, these results must be extrapolated carefully to other countries. Notwithstanding several keyword sets were used to extract the articles, some relevant articles might have been omitted. Our sample is, however, random and therefore provides a representative overview of what has been published on SSRIs and suicidality.

1  
2  
3  
4  
5  
6  
7  
8  
9  
10  
11  
12  
13  
14  
15  
16  
17  
18  
19  
20  
21  
22  
23  
24  
25  
26  
27  
28  
29  
30  
31  
32  
33  
34  
35  
36  
37  
38  
39  
40  
41  
42  
43  
44  
45  
46  
47  
48  
49  
50  
51  
52  
53  
54  
55  
56  
57  
58  
59  
60

95% agreements during article categorization (effect, type of article, and age group categories). We did not, however, ascertain the context of the articles in terms of construction of the newspaper and opinion articles from its original source. Neither did we explore other forms of media coverage, (television, radio, magazines, or the Internet), The content analysis method used in this study does not allow for these additional more complex queries.

Our results showing a positive publication tendency in scientific journals are consistent with previous work, which demonstrated that antidepressant trials with a positive outcome were published more often than those with negative outcomes.[23] This positive publication tendency continued even after the regulatory warnings, and could potentially leave physicians with a biased view of the medications that they are prescribing to patients. Studies questioning these warnings, and the possible disservice they did to public health (e.g., the possible inverse association between SSRIs prescriptions and suicidality, or the decline in treatment of depression in paediatrics) contributed to this post-warning positive-effect trend.[16,17] On the other hand, this positive publication tendency in scientific journals does not seem to prevent the dissemination of 'bad' news about medications. For instance, science journalism articles (newspapers) that presented a negative publication tendency regarding SSRIs (ratio=0.7), could not be related to the positive publication tendency found in scientific journals. These findings indicate that either newspaper journalists may selectively report scientific outcomes to the public, as also stated in the CHMP assessment report on antidepressants,[24] or that controversial topics might be selected to increase readership.[4,10,25,26] Such practices might generate confusion, since the translation of evidence-based medicine to the public is not

**Deleted:** 0

**Deleted:** news media channels

**Deleted:** were not explored

**Deleted:** It would be interesting to analyse the dynamics of knowledge dissemination by other channels during a drug safety event. However, the systematic analysis of Internet data remains methodologically complicated since web sites, blogs, forums, etc, come and go easily, and yet is a massive source of (mis-) information.

**Deleted:** The finding that scientific and medical journals reported mainly positive therapeutic outcomes regarding SSRIs might be the influence of a publication bias in research articles, based on clinical study outcomes. Our results are

**Deleted:** However, we differentiated that the positive-effect reporting trend still dominated after

**Deleted:** e newspaper dissemination of scientific-based evidence to the public revealed inconsistencies.

**Deleted:** n overall negative-effect

**Deleted:** overall positive-effect reporting trend

**Deleted:** and medical

**Deleted:** , and sometimes misleading.

uniform[2,5,12,27], and may have implications for patients compliance with medications, willingness to see physicians, and trust in the doctor-patient relationship. However, scientific and medical journals might also do disfavoured to the scientific community by favouring positive outcome studies, thus limiting the journalists' sources of accurate and critic information to communicate to the public new scientific and medical evidence.

Deleted: .

The uncertainties regarding the SSRIs' benefit/risk balance, primarily in paediatrics, have led to the restriction of almost all SSRIs under 18 year olds in 2003 and further restrictions for young adults (18 to 24 years old) in 2007.[13-15,28] In the same periods, our data revealed shifts towards negative-effect reporting trends in scientific and newspaper articles on paediatrics and opinion articles. The timing between the warnings and the observed increase in articles substantiate the possible influence of warnings on media publication trends. Moreover, this increment in the number of articles suggests that newspapers informed the public about this particular drug safety event in a timely fashion.

Deleted: Alterations in publication trends of scientific and medical journals and newspapers could be the direct result of the controversy.

Deleted: A causal association between this sudden publication growth and the regulatory warnings was not assessed. However, t

Deleted: might

Deleted: might also indicate

Studies have underlined the relevance of informing the public, about medical news within a suitable time frame.[6,29] However, these studies only focused on a subset of scientific journals, whereas we did not discriminate among scientific journals. A balance between timely coverage, consistent, and adequate information is fundamental when reporting on drug safety controversies. Ideally, this balance should be the result of an open dialogue between healthcare practitioners, academia, governmental agencies, the pharmaceutical industry, journalists and the public. However difficult, educating the public properly and on time about the benefits and the risks of medicines will help to maintain public trust during unsettling periods,[30].

Deleted: Burns et al.

Deleted: 's

Deleted: right to be informed

Deleted: eir

Deleted: y

Deleted: two high-ranked

Deleted: and high-quality

Deleted: lay

Deleted: Eventually, the public ought to and will be properly educated

Deleted: by doing so

Deleted: And, more importantly, public trust will be maintained during unsettling periods.

1  
2  
3  
4  
5  
6  
7  
8  
9  
10  
11  
12  
13  
14  
15  
16  
17  
18  
19  
20  
21  
22  
23  
24  
25  
26  
27  
28  
29  
30  
31  
32  
33  
34  
35  
36  
37  
38  
39  
40  
41  
42  
43  
44  
45  
46  
47  
48  
49  
50  
51  
52  
53  
54  
55  
56  
57  
58  
59  
60

Finally, the possible implications of the discovered tendencies in scientific journals and newspapers for patients and doctors have not been addressed in this paper. It has been shown that news media reports (on suicide, or related to suicide) have an influence on suicidal behaviour, and on drug usage.[31,32] It might be valuable in this regard to determine the long-term influence of media coverage and the regulatory warnings on prescription patterns.

Deleted: T

Deleted: SSRIs and suicidality debate for mentally ill patients

Deleted: must be more adequately

Deleted: demonstrated

Deleted: Further research in this regard might

Deleted: extent to which scientific journals and newspapers influenced this group of patients by investigating the long-term prescribing behaviour of SSRIs.

## Conclusion

Our study of the SSRIs and suicidality controversy showed several publication tendencies in scientific journals and newspapers. We identified a positive publication tendency inherent in journal research articles, which could potentially affect doctors' assessment of the safety and effectiveness of the medications that they are prescribing to patients. This apparent positive publication bias in scientific journals, however, does not seem to prevent the dissemination of 'bad' news about medications. The occurrence of 'good' or 'bad' news in scientific journals and newspapers was found to be dependent on the news category or type of article. Opinion reports in scientific journals did not differ significantly in the nature and timing of reporting from opinion articles in Dutch and British dailies. Differences between the Dutch and British newspaper reporting patterns were minor. The negative tendency present in Dutch and British newspapers was perceivable in the paediatrics group and during the warnings, indicating that newspapers have informed the public about this drug safety controversy on time. It also shows that a proactive and transparent risk communication strategy of regulatory offices and the pharmaceutical industry

Deleted: Publication trends in scientific journals and newspapers, during a drug safety controversy, appear to be more affected by regulatory actions, opinion or lawsuits, than by a straightforward translation of evidence-based medicine. The apparent positive publication bias, based on clinical study outcomes,

Deleted: Agreements in the nature of opinion reports were found in scientific journals and in NL and UK dailies.

Deleted: The increase in the number of articles in scientific journals and in newspapers during regulatory warnings might indicate that prompt news dissemination through these channels has helped to inform the public about this drug safety controversy in a timely fashion.

1  
2 might pay off in the long run for reporting on the benefits and risks of  
3  
4 medications.  
5

6 Deleted: WHAT IS ALREADY  
7 KNOWN ON THE SUBJECT  
8 <#>Coverage of health related  
9 issues exemplify the relevance of  
10 scientific journals evidence  
11 through news media to inform the  
12 public, yet information might be  
13 distorted or confusing in some  
14 cases.  
15 <#>The coverage of drug safety  
16 controversies in newspapers vis-à-  
17 vis scientific journals has not been  
18 thoroughly studied. ... [1]

19  
20  
21  
22  
23  
24  
25  
26  
27  
28  
29  
30  
31  
32  
33  
34  
35  
36  
37  
38  
39  
40  
41  
42  
43  
44  
45  
46  
47  
48  
49  
50  
51  
52  
53  
54  
55  
56  
57  
58  
59  
60

For peer review only

**Table 1.** Characteristics of the 1141 articles in NL & UK newspapers and in scientific journals (2000–2009)

| Characteristics               | Scientific Journals<br>(n=352) | NL newspapers<br>(n=224) | UK newspapers<br>(n=565) |
|-------------------------------|--------------------------------|--------------------------|--------------------------|
| <b>Effect*</b>                |                                |                          |                          |
| Positive                      | 191 (54)                       | 65 (29)                  | 192 (34)                 |
| Neutral                       | 106 (30)                       | 66 (29)                  | 169 (30)                 |
| Negative                      | 55 (16)                        | 93 (42)                  | 204 (36)                 |
| Positive to negative<br>ratio | 3.5                            | 0.69                     | 0.94                     |
| <b>Type of article</b>        |                                |                          |                          |
| Case study                    | 13 (4)                         | N/A                      | N/A                      |
| Research                      | 210 (60)                       | N/A                      | N/A                      |
| Opinion                       | 121 (34)                       | 25 (11)                  | 107 (19)                 |
| Policy                        | 8 (2)                          | 11 (5)                   | 10 (2)                   |
| Interview                     | N/A                            | 38 (17)                  | 77 (14)                  |
| News report                   | N/A                            | 110 (49)                 | 291 (52)                 |
| Science journalism            | N/A                            | 40 (18)                  | 80 (14)                  |
| <b>Age group</b>              |                                |                          |                          |
| Adults                        | 89 (25)                        | 128 (57)                 | 313 (55)                 |
| Paediatric                    | 108 (31)                       | 30 (13)                  | 92 (16)                  |
| Both                          | 80 (23)                        | 32 (14)                  | 66 (12)                  |
| Unspecified                   | 75 (21)                        | 34 (15)                  | 94 (17)                  |

1  
2 \*Statistically significant differences in effect classification were observed  
3  
4 between scientific journals and newspapers ( $P < 0.001$ ), but not between NL and  
5  
6 UK dailies ( $P = 0.116$ ). N/A=not applicable.  
7  
8  
9  
10  
11  
12  
13  
14  
15  
16  
17  
18  
19  
20  
21  
22  
23  
24  
25  
26  
27  
28  
29  
30  
31  
32  
33  
34  
35  
36  
37  
38  
39  
40  
41  
42  
43  
44  
45  
46  
47  
48  
49  
50  
51  
52  
53  
54  
55  
56  
57  
58  
59  
60

For peer review only

**Table 2.** Allocation of effect categories related to types of article and age groups, and differentiated by source (NL & UK newspaper articles combined)

| Categories                    |                       | Positive | Neutral | Negative | Positive to<br>negative<br>ratio | p-<br>value |
|-------------------------------|-----------------------|----------|---------|----------|----------------------------------|-------------|
| NL newspapers                 |                       | 65       | 66      | 93       | 0.69                             | 0.116       |
| UK newspapers                 |                       | 192      | 169     | 204      | 0.94                             |             |
| Scientific journals           |                       | 191      | 106     | 55       | 3.50                             | <0.001      |
| NL & UK Newspapers<br>(mixed) |                       | 257      | 235     | 297      | 0.86                             |             |
| Type of article               |                       |          |         |          |                                  |             |
|                               | Case study            | 4        | 4       | 5        | 0.80                             | <0.001      |
| Scientific<br>journals        | Research              | 144      | 49      | 17       | 8.47                             |             |
|                               | Opinion               | 39       | 49      | 33       | 1.18                             |             |
|                               | Policy                | 3        | 5       | 0        | 3.00                             |             |
|                               | Interview             | 69       | 30      | 16       | 4.31                             | <0.001      |
|                               | News report           | 88       | 125     | 188      | 0.47                             |             |
| Newspapers*                   | Science<br>journalism | 38       | 30      | 52       | 0.73                             |             |
|                               | Opinion               | 60       | 43      | 29       | 2.07                             |             |
|                               | Policy                | 2        | 7       | 12       | 0.17                             |             |
| Age group                     |                       |          |         |          |                                  |             |
| Scientific                    | Adults                | 70       | 12      | 7        | 10.0                             | <0.001      |



|    |            |             |     |     |     |      |
|----|------------|-------------|-----|-----|-----|------|
| 1  |            |             |     |     |     |      |
| 2  |            |             |     |     |     |      |
| 3  | journals   | Paediatric  | 48  | 39  | 21  | 2.29 |
| 4  |            | Both        | 33  | 29  | 18  | 1.83 |
| 5  |            | Unspecified | 40  | 26  | 9   | 4.44 |
| 6  |            |             |     |     |     |      |
| 7  |            |             |     |     |     |      |
| 8  |            |             |     |     |     |      |
| 9  |            | Adults      | 176 | 145 | 120 | 1.47 |
| 10 |            |             |     |     |     |      |
| 11 | Newspapers | Paediatric  | 18  | 20  | 84  | 0.21 |
| 12 |            | Both        | 22  | 33  | 43  | 0.51 |
| 13 |            | Unspecified | 41  | 37  | 50  | 0.82 |
| 14 |            |             |     |     |     |      |
| 15 |            |             |     |     |     |      |
| 16 |            |             |     |     |     |      |
| 17 |            |             |     |     |     |      |
| 18 |            |             |     |     |     |      |
| 19 |            |             |     |     |     |      |
| 20 |            |             |     |     |     |      |
| 21 |            |             |     |     |     |      |
| 22 |            |             |     |     |     |      |
| 23 |            |             |     |     |     |      |
| 24 |            |             |     |     |     |      |
| 25 |            |             |     |     |     |      |
| 26 |            |             |     |     |     |      |
| 27 |            |             |     |     |     |      |
| 28 |            |             |     |     |     |      |
| 29 |            |             |     |     |     |      |
| 30 |            |             |     |     |     |      |
| 31 |            |             |     |     |     |      |
| 32 |            |             |     |     |     |      |
| 33 |            |             |     |     |     |      |
| 34 |            |             |     |     |     |      |
| 35 |            |             |     |     |     |      |
| 36 |            |             |     |     |     |      |
| 37 |            |             |     |     |     |      |
| 38 |            |             |     |     |     |      |
| 39 |            |             |     |     |     |      |
| 40 |            |             |     |     |     |      |
| 41 |            |             |     |     |     |      |
| 42 |            |             |     |     |     |      |
| 43 |            |             |     |     |     |      |
| 44 |            |             |     |     |     |      |
| 45 |            |             |     |     |     |      |
| 46 |            |             |     |     |     |      |
| 47 |            |             |     |     |     |      |
| 48 |            |             |     |     |     |      |
| 49 |            |             |     |     |     |      |
| 50 |            |             |     |     |     |      |
| 51 |            |             |     |     |     |      |
| 52 |            |             |     |     |     |      |
| 53 |            |             |     |     |     |      |
| 54 |            |             |     |     |     |      |
| 55 |            |             |     |     |     |      |
| 56 |            |             |     |     |     |      |
| 57 |            |             |     |     |     |      |
| 58 |            |             |     |     |     |      |
| 59 |            |             |     |     |     |      |
| 60 |            |             |     |     |     |      |

\* Statistically significant differences in effect distributions related to types of article were also observed in UK newspaper articles ( $P < 0.001$ ), and in NL newspaper articles ( $P = 0.011$ ).

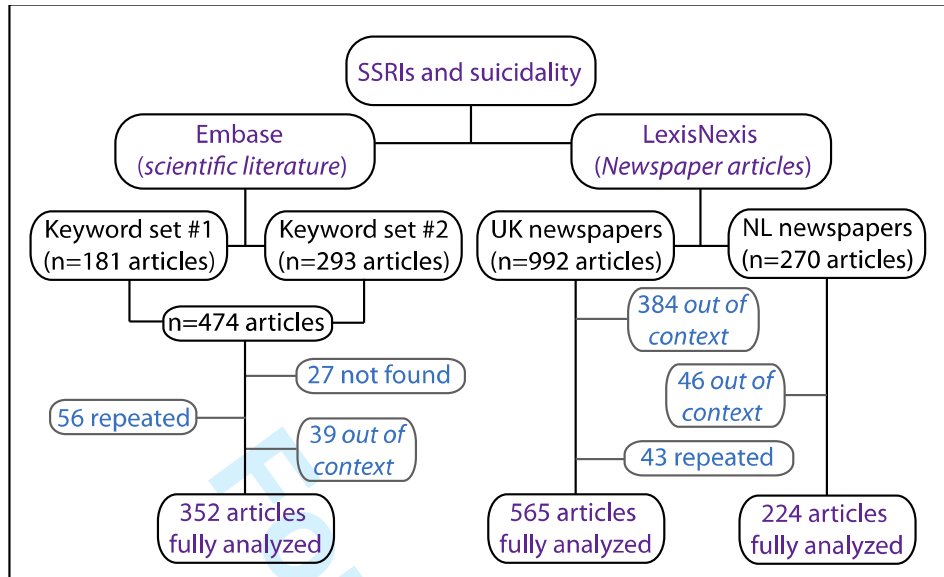

Figure 1. Scheme of the search process performed in the scientific and medical literature and in NL & UK newspapers.

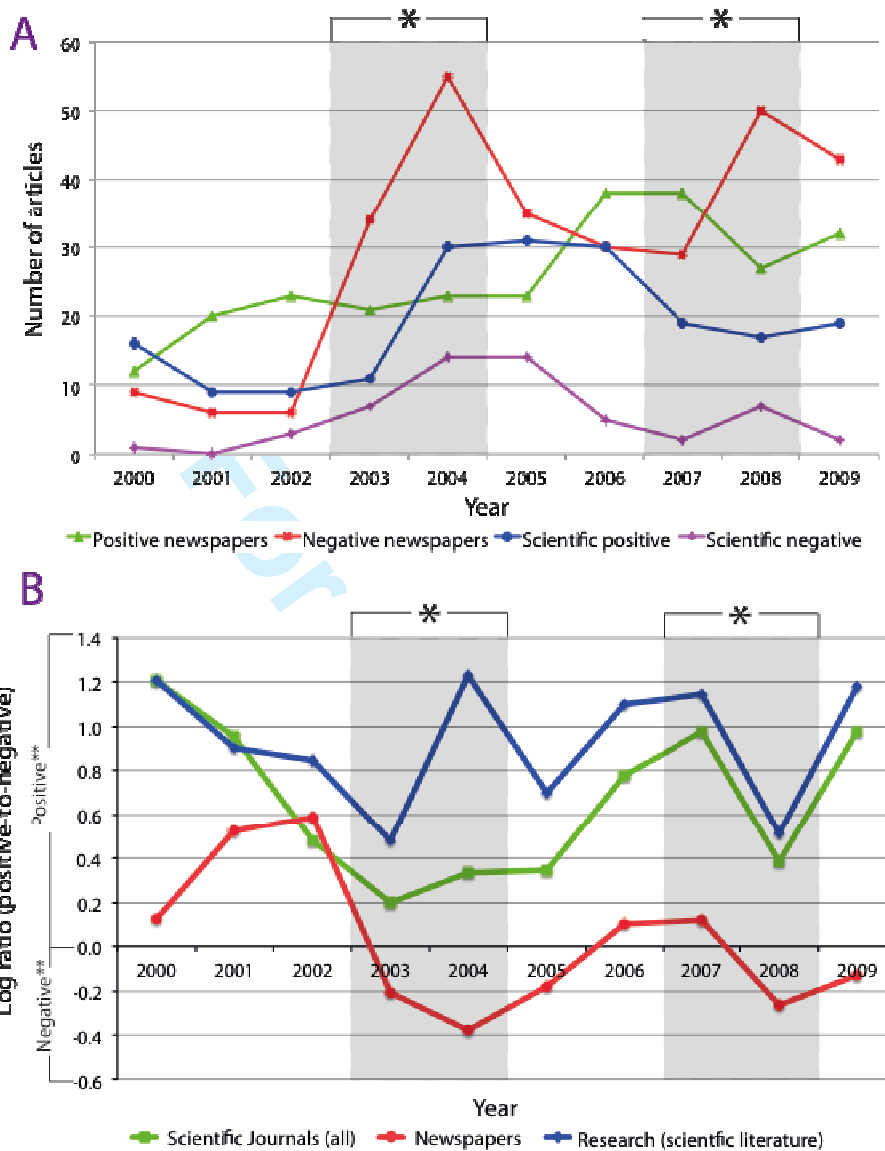

Figure 2. (A) Effect messages (positive and negative) organized along the research period, per year (2000–2009) and according to the source (scientific-medical journals and newspapers). (B) The natural logarithm of the positive-to-negative ratio was calculated and also plotted for the accumulated scientific-medical articles (green line), accumulated newspaper articles (red line), and solely research articles from the scientific-medical literature (dark blue line). \*The grey zone illustrates the period where most of the regulatory warnings were issued. \*\*Articles with a positive-

1  
2  
3  
4  
5  
6  
7  
8  
9  
10  
11  
12  
13  
14  
15  
16  
17  
18  
19  
20  
21  
22  
23  
24  
25  
26  
27  
28  
29  
30  
31  
32  
33  
34  
35  
36  
37  
38  
39  
40  
41  
42  
43  
44  
45  
46  
47  
48  
49  
50  
51  
52  
53  
54  
55  
56  
57  
58  
59  
60

effect trend are located above zero, whilst articles conveying a negative-effect trend are located underneath zero.

For peer review only

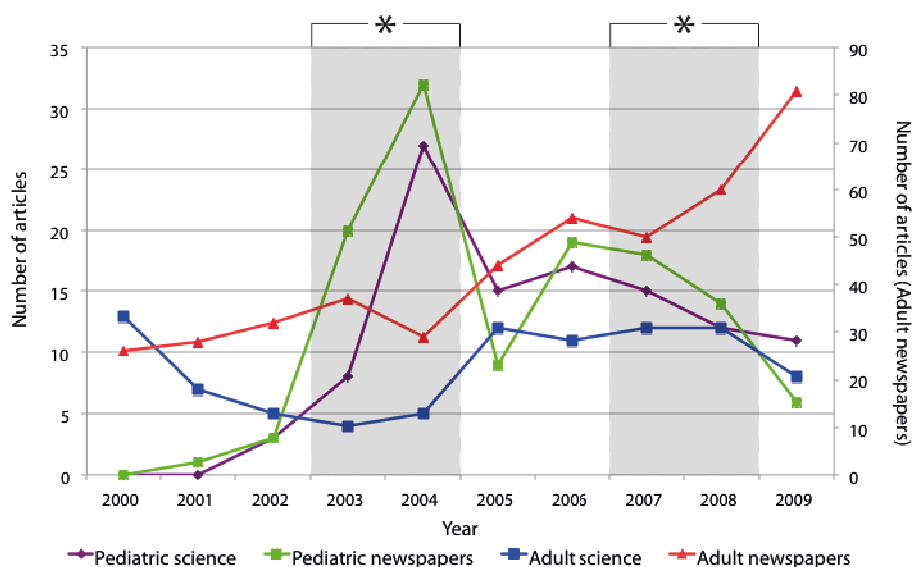

**Figure 3.** Articles indexed into age groups (paediatric and adult) in scientific-medical journals and in newspapers from 2000 to 2009. The scale of newspaper articles on adults is portrayed on the right y-axis. \*The grey zone illustrates the period where most of the regulatory warnings were issued.

**Author's contributions:** All authors were involved in the design of the study, review of earlier versions of the manuscript, and providing final approval for submission. JFH was responsible for the collection, analysis (also statistical), and interpretation of the data, as well as drafting, and revising the manuscript. TP was responsible for the analysis and interpretation of the data, drafting supervision, and revision. SVB provided support with the statistical analyses, as well.

[Data deposited at Dryad: doi:10.5061/dryad.gm2534t7](https://doi.org/10.5061/dryad.gm2534t7)

**Competing interests:** JAMR is part-time professor at the Utrecht University and vice-president external scientific collaborations for GSK in Europe, and holds

1  
2 stock in GSK. All other authors declare no personal conflict of interest relevant to  
3  
4 the subject matter or materials discussed in the manuscript. This study was  
5  
6 performed in the context of the Escher project (T6-202), a project of the Dutch  
7  
8 Top Institute Pharma. The Division of Pharmacoepidemiology and Clinical  
9  
10 Pharmacology, employing authors JFH, AKM, SVB, JAMR, and TP, has received  
11  
12 unrestricted funding for pharmacoepidemiological research from  
13  
14 GlaxoSmithKline (GSK), the private-public funded Top Institute Pharma  
15  
16 (www.tipharma.nl, includes co-funding from universities, government, and  
17  
18 industry), the Dutch Medicines Evaluation Board, and the Dutch Ministry of  
19  
20 Health.  
21

22  
23 **Role of the funding source:** None to declare.  
24  
25  
26  
27  
28  
29  
30  
31  
32  
33  
34  
35  
36  
37  
38  
39  
40  
41  
42  
43  
44  
45  
46  
47  
48  
49  
50  
51  
52  
53  
54  
55  
56  
57  
58  
59  
60

## References

- 1 Wilson A, Bonevski B, Jones A, Henry D. Media reporting of health interventions: signs of improvement, but major problems persist. PLoS One 2009;4(3):e4831.
- 2 Moynihan R, Bero L, Ross-Degnan D, Henry D, Lee K, Watkins J, et al. Coverage by the news media of the benefits and risks of medications. N Engl J Med 2000;342(22):1645-50.
- 3 Ries NM, Rachul C, Caulfield T. Newspaper reporting on legislative and policy interventions to address obesity: United States, Canada, and the United Kingdom. J Public Health Policy 2011;32(1):73-90.
- 4 Bartlett C, Sterne J, Egger M. What is newsworthy? Longitudinal study of the reporting of medical research in two British newspapers. BMJ 2002;325(7355):81-4.
- 5 [Lai WYY, Lane T. Characteristics of Medical Research News Reported on Front Pages of Newspapers. PLoS One. 2009 Jul 1;4\(7\).](#)
- 6 [Canales MK, Breslau ES, Nelson DE, Ballard-Barbash RR. Did news reporters get it right? Translation of the 2002 hormone study findings. American Journal of Preventive Medicine. 2008 Jan;34\(1\):61-8.](#)
- 7 Dentzer S. Communicating Medical News — Pitfalls of Health Care Journalism. N Engl J Med 2009;360(1):1-3.
- 8 David F, Archer MD. Medical decisions regarding hormone therapy for menopausal women are significantly influenced by the media. Pharmacoepidemiol Drug Saf. 2007;16(1):28-31.

**Deleted:** Entwistle V. Reporting research in medical journals and newspapers. BMJ 1995;310(6984):920-3.¶

**Deleted:** Van Trigt AM, De Jong-Van Den Berg LTW, Voogt LM, Willems J, T.Dirk Tromp FJ, Haaijer-Ruskamp FM. Setting the agenda: Does the medical literature set the agenda for articles about medicines in the newspapers? Soc Sci Med 1995;41(16):893-9.

1  
2  
3 9 Williams D, Kelly A, Feely J. Influence of media and regulatory changes on  
4 prescribing of Cotrimoxazole and Trimethoprim in Ireland. *Pharmacoepidemiol*  
5  
6 *Drug Saf.* 2000;9(4):313-7.  
7

8  
9 10 Mebane FE. The importance of news media in pharmaceutical risk  
10 communication: proceedings of a workshop. *Pharmacoepidemiol Drug Saf.*  
11  
12 2005;14(5):297-306.  
13

14  
15 11 Grilli R, Ramsay C, Minozzi S. Mass media interventions: effects on health  
16 services utilisation. *Cochrane Database Syst Rev.* 2002(1):CD000389.  
17

18  
19 12 Danovaro-Holliday MC, Wood AL, LeBaron CW. Rotavirus vaccine and the  
20 news media, 1987-2001. *JAMA* 2002;287(11):1455-62.  
21

22  
23 13 FDA. Suicidality in Children and Adolescents Being Treated With  
24 Antidepressant Medications. Rockville, MD: Department of Health and Human  
25 Services, 2004.  
26  
27 [http://www.fda.gov/Drugs/DrugSafety/PostmarketDrugSafetyInformationforPa](http://www.fda.gov/Drugs/DrugSafety/PostmarketDrugSafetyInformationforPatientsandProviders/DrugSafetyInformationforHealthcareProfessionals/PublicHealthAdvisories/ucm161679.htm)  
28  
29 [tientsandProviders/DrugSafetyInformationforHeathcareProfessionals/PublicHe](http://www.fda.gov/Drugs/DrugSafety/PostmarketDrugSafetyInformationforPatientsandProviders/DrugSafetyInformationforHealthcareProfessionals/PublicHealthAdvisories/ucm161679.htm)  
30  
31 [althAdvisories/ucm161679.htm](http://www.fda.gov/Drugs/DrugSafety/PostmarketDrugSafetyInformationforPatientsandProviders/DrugSafetyInformationforHealthcareProfessionals/PublicHealthAdvisories/ucm161679.htm) (accessed January 20, 2011).  
32  
33

34  
35 14 EMA. European Medicines Agency finalises review of antidepressants in  
36 children and adolescents. London: EMA, 2005.  
37  
38 [http://www.ema.europa.eu/ema/index.jsp?curl=pages/news\\_and\\_events/news](http://www.ema.europa.eu/ema/index.jsp?curl=pages/news_and_events/news/2009/12/news_detail_000882.jsp&murl=menus/news_and_events/news_and_events.jsp&mid=WC0b01ac058004d5c1)  
39  
40 [/2009/12/news\\_detail\\_000882.jsp&murl=menus/news\\_and\\_events/news\\_and](http://www.ema.europa.eu/ema/index.jsp?curl=pages/news_and_events/news/2009/12/news_detail_000882.jsp&murl=menus/news_and_events/news_and_events.jsp&mid=WC0b01ac058004d5c1)  
41  
42 [events.jsp&mid=WC0b01ac058004d5c1](http://www.ema.europa.eu/ema/index.jsp?curl=pages/news_and_events/news/2009/12/news_detail_000882.jsp&murl=menus/news_and_events/news_and_events.jsp&mid=WC0b01ac058004d5c1) (accessed February 4, 2011).  
43  
44

45  
46 15 MHRA. Report of the CSM Expert Working Group on the Safety of Selective  
47 Serotonin Reuptake Inhibitor Antidepressants. London: Committee on Safety of  
48 Medicines, 2004.  
49  
50



1  
2  
3  
4  
5  
6  
7  
8  
9  
10  
11  
12  
13  
14  
15  
16  
17  
18  
19  
20  
21  
22  
23  
24  
25  
26  
27  
28  
29  
30  
31  
32  
33  
34  
35  
36  
37  
38  
39  
40  
41  
42  
43  
44  
45  
46  
47  
48  
49  
50  
51  
52  
53  
54  
55  
56  
57  
58  
59  
60

[http://www.ema.europa.eu/docs/en\\_GB/document\\_library/Report/2010/01/WC500054061.pdf](http://www.ema.europa.eu/docs/en_GB/document_library/Report/2010/01/WC500054061.pdf) (accessed February 4, 2011).

16 Cheung A, Sacks D, Dewa CS, Pong J, Levitt A. Paediatric prescribing practices and the FDA Black-box warning on antidepressants. *Journal of developmental and behavioral paediatrics* : JDBP 2008;29(3):213-5.

17 Wheeler BW, Gunnell D, Metcalfe C, Stephens P, Martin RM. The population impact on incidence of suicide and non-fatal self harm of regulatory action against the use of selective serotonin reuptake inhibitors in under 18s in the United Kingdom: Ecological study. *BMJ* 2008;336(7643):542-5.

18 BBC. Panorama: The Secrets of Seroxat. London: BBC, 2002.  
[http://news.bbc.co.uk/panorama/hi/front\\_page/newsid\\_8425000/8425414.stm](http://news.bbc.co.uk/panorama/hi/front_page/newsid_8425000/8425414.stm) (accessed February 7, 2011).

19 Olsen AK, Whalen MD. Public perceptions of the pharmaceutical industry and drug safety: implications for the pharmacovigilance professional and the culture of safety. *Drug Saf.* 2009;32(10):805-10.

20 Ravindran LN, Stein MB. The pharmacologic treatment of anxiety disorders: a review of progress. *J Clin Psychiatry* 2011;71(7):839-54.

21 Department of statistics UK, 2010.  
<http://www.statistics.gov.uk/cci/nugget.asp?id=6> (accessed August 20, 2010).

22 CBS. Bevolkingsteller (Centrale Bureau van Statistiek), 2010.  
<http://www.cbs.nl/en-GB/menu/themas/bevolking/cijfers/extra/bevolkingsteller.htm> (accessed August 20, 2010).

- 1  
2  
3 23 Turner EH, Matthews AM, Linardatos E, Tell RA, Rosenthal R. Selective  
4 publication of antidepressant trials and its influence on apparent efficacy. *N Engl*  
5  
6  
7  
8  
9 24 EMA. CHMP Assessment Report on Antidepressants. London: EMA, 2008.  
10 [http://www.ema.europa.eu/docs/en\\_GB/document\\_library/Report/2010/01/](http://www.ema.europa.eu/docs/en_GB/document_library/Report/2010/01/WC500054061.pdf)  
11 [WC500054061.pdf](http://www.ema.europa.eu/docs/en_GB/document_library/Report/2010/01/WC500054061.pdf) (accessed February 7, 2011).  
12  
13  
14 25 Franklin B, Hamer M, Hanna M, Kinsey M, Richardson J. Key concepts in  
15 journalism studies. Sage: London, Thousand Oaks, California: Sage 2005.  
16  
17 26 Iggers J. Good news, bad news: journalism ethics and the public interest.  
18 Schiller HI, editor. Boulder, Colorado: Westview press, 1999.  
19  
20  
21 27 Koren G, Klein N. Bias against negative studies in newspaper reports of  
22 medical research. *JAMA* 1991;266(13):1824-6.  
23  
24  
25 28 FDA. Antidepressant Use in Children, Adolescents, and Adults. Rockville,  
26 MD: Department of Health and Human Services, 2007.  
27  
28  
29 [http://www.fda.gov/Drugs/DrugSafety/InformationbyDrugClass/ucm096273.h](http://www.fda.gov/Drugs/DrugSafety/InformationbyDrugClass/ucm096273.htm)  
30 [tm](http://www.fda.gov/Drugs/DrugSafety/InformationbyDrugClass/ucm096273.htm) (accessed February 7, 2011).  
31  
32  
33 29 [Stryker JE. Reporting Medical Information: Effects of Press Releases and](#)  
34 [Newsworthiness on Medical Journal Articles' Visibility in the News Media.](#)  
35 [Preventive Medicine. 2002;35\(5\):519-30.](#)  
36  
37  
38  
39  
40  
41  
42 30 Karacsony A, Rosenbaum J. Recapturing the vision: restoring trust in the  
43 pharmaceutical industry by translating expectations into actions, 2007.  
44  
45 [http://www.pwc.com/gx/en/pharma-life-sciences/pharmaceutical-industry-](http://www.pwc.com/gx/en/pharma-life-sciences/pharmaceutical-industry-thought-leadership.jhtml)  
46 [thought-leadership.jhtml](http://www.pwc.com/gx/en/pharma-life-sciences/pharmaceutical-industry-thought-leadership.jhtml) (accessed July 21, 2011).  
47  
48  
49  
50 31 Pirkis J, Blood RW. Suicide and the media. Part I: Reportage in  
51 nonfictional media. *Crisis* 2001;22(4):146-54.  
52  
53  
54  
55  
56  
57  
58  
59  
60

**Deleted:** Burns RB, Moskowitz MA, Osband MA, Kazis LE. Newspaper reporting of the medical literature. *J Gen Intern Med* 1995;10(1):19-24.

1  
2 32 Martin RM, May M, Gunnell D. Did intense adverse media publicity impact  
3  
4 on prescribing of paroxetine and the notification of suspected adverse drug  
5  
6 reactions? Analysis of routine databases, 2001-2004. Br J Clin Pharmacol.  
7  
8 2006;61(2):224-8.  
9  
10  
11  
12  
13  
14  
15  
16  
17  
18  
19  
20  
21  
22  
23  
24  
25  
26  
27  
28  
29  
30  
31  
32  
33  
34  
35  
36  
37  
38  
39  
40  
41  
42  
43  
44  
45  
46  
47  
48  
49  
50  
51  
52  
53  
54  
55  
56  
57  
58  
59  
60

For peer review only

WHAT IS ALREADY KNOWN ON THE SUBJECT

Coverage of health related issues exemplify the relevance of scientific journals evidence through news media to inform the public, yet information might be distorted or confusing in some cases.

The coverage of drug safety controversies in newspapers vis-à-vis scientific journals has not been thoroughly studied.

WHAT THIS STUDY ADDS

A positive publication bias was confirmed in scientific journals, however, based on clinical studies outcomes, whereas 'bad' news in scientific journals and newspapers was related to opinion, not evidence.

This 'bad' news trend was connected to the regulatory warnings, meaning that the public was informed on time about the SSRIs and suicidality controversy, although the information that reached the public was not uniform.

An open dialogue between stakeholders will improve communication to the public and will educate them about the benefits and risks of medicines, especially during a drug safety controversy.

1  
2  
3 **Please note:** BMJ Group requires compliance to the following reporting guidelines, please  
4 upload your completed check-list with your submission and label it " Research checklist":  
5  
6

7 **Guidance and forms are available [here](#)**

- 8  
9 •CONSORT statement - *Required for all randomised controlled trials*  
10 •PRISMA statement - *Required for all systematic reviews*  
11 •EVEREST statement - *Required for all economic evaluations*  
12 •STARD statement - *Required for all diagnostic research papers*  
13 •STROBE statement - *Required for all observational studies*  
14 •MOOSE statement - *Required for all meta-analyses of observational studies*  
15  
16  
17  
18  
19  
20  
21  
22  
23  
24  
25  
26  
27  
28  
29  
30  
31  
32  
33  
34  
35  
36  
37  
38  
39  
40  
41  
42  
43  
44  
45  
46  
47  
48  
49  
50  
51  
52  
53  
54  
55  
56  
57  
58  
59  
60

1  
2  
3  
4  
5  
6  
7  
8  
9  
10  
11  
12  
13  
14  
15  
16  
17  
18  
19  
20  
21  
22  
23  
24  
25  
26  
27  
28  
29  
30  
31  
32  
33  
34  
35  
36  
37  
38  
39  
40  
41  
42  
43  
44  
45  
46  
47  
48  
49  
50  
51  
52  
53  
54  
55  
56  
57  
58  
59  
60



92x49mm (300 x 300 DPI)

review only



267x344mm (300 x 300 DPI)

1  
2  
3  
4  
5  
6  
7  
8  
9  
10  
11  
12  
13  
14  
15  
16  
17  
18  
19  
20  
21  
22  
23  
24  
25  
26  
27  
28  
29  
30  
31  
32  
33  
34  
35  
36  
37  
38  
39  
40  
41  
42  
43  
44  
45  
46  
47  
48  
49  
50  
51  
52  
53  
54  
55  
56  
57  
58  
59  
60



158x97mm (300 x 300 DPI)

Review only
